1 **Defining the cell surface proteomic landscape of multiple myeloma reveals**  
2 **immunotherapeutic strategies and biomarkers of drug resistance**

3

4 **Authors:**

5 Ian D. Ferguson<sup>1,#</sup>, Bonell Patiño Escobar<sup>1</sup>, Sami T. Tuomivaara<sup>1</sup>, Yu-Hsiu T. Lin<sup>1</sup>,  
6 Matthew A. Nix<sup>1</sup>, Kevin K. Leung<sup>2</sup>, Martina Hale<sup>1</sup>, Priya Choudhry<sup>1</sup>, Antonia Lopez-  
7 Girona<sup>3</sup>, Emilio Ramos<sup>1,4</sup>, Sandy W. Wong<sup>5</sup>, Jeffrey L. Wolf<sup>5</sup>, Thomas G. Martin III<sup>5</sup>,  
8 Nina Shah<sup>5</sup>, Scott Vandenberg<sup>4</sup>, Sonam Prakash<sup>1</sup>, Lenka Besse<sup>6</sup>, Christoph Driessen<sup>6</sup>,  
9 James A. Wells<sup>2</sup>, Arun P. Wiita<sup>1,\*</sup>

10

11 **Affiliations:**

12 <sup>1</sup>Dept. of Laboratory Medicine, University of California, San Francisco, CA

13 <sup>2</sup>Dept. of Pharmaceutical Chemistry, University of California, San Francisco, CA

14 <sup>3</sup>Bristol Myers Squibb/Celgene, San Diego, CA

15 <sup>4</sup>Dept. of Pathology, University of California, San Francisco, CA

16 <sup>5</sup>Dept. of Medicine, Division of Hematology/Oncology, University of California, San  
17 Francisco, CA

18 <sup>6</sup>Dept. of Medical Oncology and Hematology, Kantonsspital St. Gallen, St. Gallen,  
19 Switzerland

20 *#Present Address:* Cancer Biology Program, Stanford University School of Medicine,  
21 Stanford, CA

22

23 *\*Correspondence:*

24 Arun P. Wiita, MD, PhD

25 University of California, San Francisco

26 Dept. of Laboratory Medicine

27 185 Berry St.

28 Ste 290

29 San Francisco, CA 94107

30 Email: [arun.wiita@ucsf.edu](mailto:arun.wiita@ucsf.edu)

31

1 **ABSTRACT**

2 The myeloma cell surface proteome (“surfaceome”) not only determines tumor  
3 interaction with the microenvironment but serves as an emerging arena for therapeutic  
4 development. Here, we use glycoprotein capture proteomics to first define surface  
5 markers most-enriched on myeloma when compared to B-cell malignancy models,  
6 revealing unexpected biological signatures unique to malignant plasma cells. We next  
7 integrate our proteomic dataset with existing transcriptome databases, nominating CCR10  
8 and TXNDC11 as possible monotherapeutic targets and CD48 as a promising co-target  
9 for increasing avidity of BCMA-directed cellular therapies. We further identify potential  
10 biomarkers of resistance to both proteasome inhibitors and lenalidomide including  
11 changes in CD53, EVI2B, CD10, and CD33. Comparison of short-term treatment with  
12 chronic resistance delineates large differences in surface proteome profile under each  
13 type of drug exposure. Finally, we develop a miniaturized version of the surface  
14 proteomics protocol and present the first surface proteomic profile of a primary myeloma  
15 patient plasma cell sample. Our dataset provides a unique resource to advance the  
16 biological, therapeutic, and diagnostic understanding of myeloma.

17

## 1 INTRODUCTION

2 The composition of the tumor cell surface plays a central role in determining cancer's  
3 interaction with the local microenvironment. Over the past several years, targeting  
4 surface proteins expressed on tumor cells has also rapidly emerged as one of the most  
5 exciting frontiers for treating cancer. This strategy is particularly relevant in the case of  
6 the plasma cell malignancy multiple myeloma. Antibody-based therapeutics targeting  
7 CD38, SLAMF7 and BCMA have now been FDA-approved, and engineered cellular  
8 therapies targeting BCMA have shown highly promising clinical data. Furthermore,  
9 identifying and quantifying cell surface markers play a critical role in the diagnosis and  
10 monitoring of all hematologic malignancies, including myeloma.

11 One of the notable clinical features of myeloma is that despite the recent advent of  
12 many effective therapies, there is still no known cure for this disease. Resistance to  
13 current small molecule therapeutics, particularly proteasome inhibitors such as  
14 bortezomib and carfilzomib, and immunomodulatory drugs such as lenalidomide, is a  
15 widespread conundrum. Characterizing surface proteomic changes in these contexts may  
16 reveal new strategies to diagnose and specifically treat drug-resistant disease.

17 Despite the importance of the cell surface to diagnosis, therapy, and biology of  
18 myeloma, much remains unknown. While extensive RNA-seq datasets are available on  
19 both myeloma primary samples (such as the Multiple Myeloma Research Foundation  
20 CoMMpass study ([research.themmr.org](https://research.themmr.org))) and cell lines ([keatslab.org](https://keatslab.org) and Cancer Cell  
21 Line Encyclopedia (1)), it is well-known that transcript-level expression is only modestly  
22 correlated with surface protein expression (2-4). This lack of predictive power is related  
23 to two main features. First, even for proteins exclusively present at the plasma membrane,  
24 transcript-only quantification cannot capture alterations in translational regulation and  
25 protein trafficking that ultimately govern surface expression. Second, proteins expressed  
26 at the cell surface can also have significant pools of either intracellular or secreted forms  
27 as well; RNA-seq cannot distinguish these components. Therefore, these datasets can at  
28 best be considered partially predictive of the cell surface proteome.

29 Other studies have used flow cytometry, or, more recently, mass  
30 cytometry/CyTOF (5), to profile myeloma tumor cells in the context of inter-patient  
31 heterogeneity (6), response to therapy (7), or drug resistance (8). However, these assays

1 are typically restricted to monitoring a maximum of ~50 surface proteins that are already  
2 very well-characterized and have high-quality antibodies available. Even a recent large-  
3 scale survey of normal human B-cells by CyTOF, screening an exhaustive catalog of 351  
4 metal-conjugated antibodies, only identified 98 expressed surface proteins (9). It is  
5 estimated that most human cells express >2000 unique proteins on their surface (10).  
6 Therefore, these widely-used approaches can only begin to outline the overall profile of  
7 the myeloma cell surface.

8 To overcome these limitations, here we use a relatively unbiased approach,  
9 glycoprotein cell surface capture (CSC) (11), to directly quantify hundreds of proteins  
10 localized to the surface of myeloma tumor cells. We specifically identify new potential  
11 immunotherapy strategies in myeloma and new biomarkers of small molecule resistance  
12 and response to acute treatment. Finally, to streamline the surface proteomics  
13 methodology we develop a miniaturized CSC approach and apply this approach to  
14 primary patient myeloma. Uncovering the surface landscape of malignant plasma cells  
15 serves as a significant resource to the myeloma community.

16

## 17 **RESULTS**

### 18 **Determining the malignant plasma cell surface landscape**

19 We first utilized the CSC approach to oxidize, covalently biotinylate, and then isolate N-  
20 linked glycoproteins from four multiple myeloma cell lines (KMS-12PE, AMO-1, RPMI-  
21 8226, L363) (**Fig. 1A**). Labeling was performed on live cells to generate an initial surface  
22 proteomic landscape of malignant plasma cells. In our initial analysis, using the label-free  
23 quantification approach in MaxQuant (12), we cumulatively quantified 1245 proteins  
24 annotated as membrane bound in Uniprot across all cell lines (ranging from 715-1069 in  
25 individual cell lines, with a minimum of two peptides per protein), with a common  
26 intersection of 562 proteins (**Fig. 1B**). To maximize number of captured proteins, we  
27 used glycoprotein biotinylation with on-bead trypsinization (**Fig. 1A**); however, this  
28 method is likely to also spuriously elute peptides deriving from background intracellular  
29 proteins. Filtering our data with a recently-described set of the best-validated plasma  
30 membrane proteins (10), 530 of these quantified proteins (305-436 per cell line) appear  
31 localized to the cell surface with high confidence (**Supp. Fig. 1A**). Notably, across these

1 lines we detected almost all of the major immunotherapy targets in myeloma, as well as  
2 canonical flow cytometry markers for plasma cells (7, 13): BCMA, CD138/SDC1, CD38,  
3 CD56, SLAMF7/CS-1, CD46, Integrin-b7 (ITGB7), CD74/HLA-DR, TACI,  
4 CD48/SLAMF2 and LY9/CD229 (**Fig. 1C**; **Supplementary Dataset 1**).

5 While these positive identifications are certainly encouraging for the utility of this  
6 dataset, we note this technology still cannot detect all cell surface proteins. For example,  
7 we did not detect GPRC5D, a G-protein coupled receptor (GPCR) recently proposed as a  
8 specific immunotherapy target in myeloma (14). In general, GPCRs and other multi-pass  
9 membrane proteins tend to be under-represented in CSC (4); we noted the same effect in  
10 our dataset (**Supp. Fig. 1B**). Furthermore, as in essentially all proteomic methods,  
11 proteins present at low copy number on the cell surface are less likely to be detected on  
12 the mass spectrometer (15). In addition, ~10-20% of surface proteins likely do not feature  
13 any *N*-linked glycosylation (16), and therefore will not be detectable via CSC. Despite  
14 these limitations, we propose that this initial landscape of the myeloma cell surface  
15 provides a unique resource for downstream investigation.

16 As myeloma is a malignancy of plasma cells, we were curious what surface  
17 markers particularly distinguish myeloma from B-cells earlier in the developmental  
18 trajectory. We therefore compared our myeloma surfaceome to our earlier dataset (17)  
19 including six B-cell acute lymphoblastic leukemia (B-ALL) lines derived from early (pre-  
20 or pro-) B-cell developmental stages. We further compared the myeloma surface profile  
21 to two B-lymphoblastoid cell lines (EBV-immortalized normal cord blood donor B-cells  
22 and ARH-77), derived from differentiated, late-stage B-cells (18). By Principal  
23 Component Analysis (PCA) we were encouraged to find that lines representing each cell  
24 type (plasma cells, early B-cell, late B-cell) clustered separately, consistent with a  
25 relatively unique surface signature for each cell type (**Fig. 1D**).

26 We next identified the specific markers that most distinguish myeloma plasma  
27 cells versus these other B-cell types (**Fig. 1D**; **Supp. Fig. 1C**). Giving confidence in this  
28 analysis, many canonical markers were among the strongest hits including BCMA,  
29 CD138/SDC1, and CD28 for plasma cells and CD19, CD22, and CD72 for B-ALL cells,  
30 respectively (**Fig. 1D**). Intriguingly, by intensity of mass spectrometry signal, CD38 was  
31 not significantly different between these cell types, underscoring possible clinical

1 relevance of anti-CD38 monoclonal antibody therapy in B-ALL (19). We were surprised  
2 to find the three proteins that most-distinguished myeloma plasma cells from early-stage  
3 malignant B-cells, based on fold-change and *p*-value, were not canonical markers at all:  
4 gamma-glutamyl transferase 1 (*GGT1*), selectin-P ligand (*SELPLG*), and cell adhesion  
5 molecule 1 (*CADMI*) (**Fig. 1E**). Comparison of myeloma cells to the two B-  
6 lymphoblastoid cell lines also showed CD138/SDC1 and CD28 as characterizing  
7 myeloma cells, while CD19, CD22, and CD20 characterized late-stage B-cells.  
8 SLAMF6/CD352 and SLAMF1/CD150 most strongly differentiated B-lymphoblastoid  
9 cell lines, while adenylate cyclase 3 (*ADCY3*), Podocalyxin-like (*PODXL*), and Integrin-  
10 a3/ITA3/CD49c (*ITGA3*) were the most strongly-differentiating on myeloma cells (**Supp.**  
11 **Fig. 1C**). These proteins may carry previously unexplored diagnostic or biological  
12 relevance to myeloma or broader plasma cell biology.

13 In parallel with our surface proteomic data, we also obtained RNA-seq data for all  
14 of the analyzed cell lines. We overall found a modest quantitative correlation (Pearson *R*  
15 = 0.54; *p* < 2.2e-16) between the transcriptome and surface proteome of myeloma and B-  
16 ALL cells (**Supp. Fig. 1D**), consistent with prior studies (17, 20). We did find a set of  
17 proteins, including CD99, *GGT1* and *TOR1AIP2*, with transcript level discordant with  
18 surface protein, suggestive of possible post-transcriptional regulation (**Supp. Fig. 1D**).  
19 Taken together, this initial profiling underscores the unique surface phenotype of  
20 malignant plasma cells and unexpected markers distinguishing them from closely related  
21 cellular models.

22

### 23 **Identifying new targets for myeloma antigen-specific immunotherapies**

24 We next turned our attention to possible new immunotherapeutic strategies revealed by  
25 our surface profiling. We first integrated our proteomic data with publicly-available  
26 transcriptome datasets to create a ranking system for possible single-antigen  
27 immunotherapy targets, based on five criteria related to surface abundance and specificity  
28 for plasma cells (**Fig. 2A; Supplementary Table 1**). Emphasizing the validity of this  
29 strategy, four of the top six targets by our ranking either already have FDA-approved  
30 therapeutics or are being clinically investigated in myeloma: BCMA (*TNFRSF17* gene),  
31 TACI (*TNFRSF13B*), Integrin beta-7 (*ITGB7*), and CS-1/SLAMF7 (*SLAMF7*) (**Fig. 2A**).

1 CD38, CD138/SDC1, LY9/CD229, CD48, and GPRC5D also ranked highly  
2 (**Supplementary Dataset 2**). Based on these results, we probed other high-scoring  
3 proteins found in our proteomic data that, to our knowledge, have not yet been explored  
4 as therapeutic targets in myeloma. Here we offer two particularly intriguing examples:  
5 CCR10 and TXNDC11. CCR10 is a chemokine receptor previously shown to be  
6 expressed on plasma cells and thought to relate to homing to resident tissues (21). We  
7 found this gene to be robustly expressed on myeloma plasma cells per the CCLE but with  
8 minimal expression on other tumor cell lines (**Supp. Fig. 2A**). Data from GTex also  
9 suggest low, though not absent, mRNA expression on non-hematopoietic tissues, while  
10 data included in the Human Blood Atlas suggest markedly higher mRNA expression on  
11 plasmablasts than other hematopoietic cells, with the exception of some T-cell subtypes,  
12 including T regulatory cells, consistent with prior literature (22) (**Supp. Fig. 2A**). By  
13 flow cytometry we verified markedly increased CCR10 expression on myeloma cell lines  
14 compared to B-cell malignancy lines, of the same magnitude as BCMA relative increase,  
15 and also confirmed CCR10 expression on myeloma patient tumor cells (**Supp. Fig. 2B**).  
16 Together, these features suggest CCR10 as a promising immunotherapeutic target in  
17 myeloma.

18 While TXNDC11 is generally poorly characterized, its sparse literature revolves  
19 around its role in endoplasmic reticulum (ER) associated protein degradation (23, 24).  
20 However, proteins with known ER localization may also have surface components; for  
21 example, the ER-resident HSP70 isoform BiP/GRP78 can be found at the cell surface in  
22 myeloma and serve as an immunotherapy target (25). Furthermore, immunofluorescence  
23 data in the Human Protein Atlas (26), as well as bioinformatic prediction from  
24 COMPARTMENTS (27), both place the primary location of TXNDC11 at the plasma  
25 membrane, not the ER. Similar to CCR10, while some non-hematopoietic tissues express  
26 TXNDC11, expression appears to be highly enhanced on plasma cells (**Supp. Fig. 2C**).  
27 In addition, per the Cancer Dependency Map (28), myeloma plasma cells appear  
28 somewhat genetically dependent on TXNDC11 for proliferation (**Supp. Fig. 2C**),  
29 potentially reducing probability of tumor resistance via antigen loss under therapeutic  
30 pressure. Unfortunately, we could not validate any currently available antibodies against  
31 TXNDC11 as suitable for flow cytometry (not shown). Therefore, we cannot definitively

1 confirm that TXNDC11 spans the plasma membrane, nor rule out that TXNDC11 is  
2 identified in our dataset due to spurious background labeling of intracellular  
3 glycoproteins. Future studies will probe the relevance of this potential target. While we  
4 highlight these two proteins, additional targets from our integrative analysis may also  
5 warrant further follow-up in myeloma therapy.

6

## 7 **Characterizing the most abundant myeloma surface proteins for potential co-** 8 **targeting**

9 We next reasoned that identifying the most highly-expressed proteins on the  
10 surface of plasma cells may be advantageous for certain therapeutic designs. We illustrate  
11 one potential approach in **Fig. 2B**. In this embodiment, an scFv with no intracellular  
12 signaling domains (i.e. not a full CAR construct), specifically designed for “locking on”  
13 against a high abundance tumor antigen, would be highly expressed on the surface of the  
14 engineered T-cell. However, the T-cell would only be activated after engagement of an  
15 anti-BCMA (or other highly myeloma-specific antigen) scFv incorporated into a CAR.  
16 This approach would be designed to specifically increase the avidity of CAR-T binding  
17 to tumor. We envision that this approach, by increasing T-cell dwell time on tumor, could  
18 potentially enable CAR-T killing at lower antigen densities, which recent studies have  
19 suggested may be an important determinant of efficacy (29, 30). Or, alternatively, this  
20 approach may allow for reducing CAR signaling strength to minimize exhaustion (31)  
21 while still ultimately achieving the same degree of tumor killing, given more prolonged  
22 association between T-cells and target cells.

23 In this approach, the highly abundant tumor antigen for “locking on” would not  
24 necessarily have to be extremely specific for plasma cells, as no killing would occur if  
25 BCMA (or other targeted myeloma-specific antigen) were not present. We therefore  
26 interrogated our data to identify proteins that were among 1) most highly abundant on  
27 myeloma plasma cells, 2) confidently localized to the cell surface, 3) highly expressed at  
28 transcript level in myeloma patients per the CoMMpass database; 4) highly expressed on  
29 myeloma cell lines per CCLE data (see Methods for details). This analysis identified 14  
30 potential “locking on” protein candidates (**Fig. 2D**).



1 We additionally probed biological signatures of surface proteins >2 S.D. above  
2 the LFQ mean (**Fig. 2E**). 4F2 (encoded by *SLC3A2*) and LAT1 (*SLC7A5*), which together  
3 comprise the heterodimeric large neutral amino acid transporter CD98, as well as the  
4 neutral amino acid transporter AAAT (*SLC1A5*), appear to be the most abundant proteins  
5 on the myeloma cell surface. This observation is potentially consistent with the critical  
6 role of protein synthesis in plasma cell biology. Other high-abundance plasma membrane  
7 proteins govern homeostatic mechanisms common across most human cells (AT1A1,  
8 AT1B3, TFR1/CD71). However, several of the other most highly abundant surface  
9 proteins carry specific functions in cellular signaling, either in myeloma plasma cells or  
10 hematopoietic cells more generally, including CD138/SDC1, CD47, CD38,  
11 ICAM1/CD54, ITA4/CD49d, and CD48/SLAMF2.

12 Integrating these two analyses, we specifically focused on two targets for further  
13 evaluation as “locking on” antigens: CD38 and CD48. We chose these proteins as others  
14 nominated in our analyses of **Fig. 2D-E** were expressed on at least some non-  
15 hematopoietic tissues per GTex (**Supp. Fig. 3A**), potentially leading to misdirection of  
16 CAR-T’s during the locking-on phase by homing to irrelevant body sites. We particularly  
17 note that some of these proteins, most prominently CD38, would not be identified as  
18 highly abundant on the cell surface purely based on mRNA-seq analysis, illustrating the  
19 utility of proteomic studies in this application (**Supp. Fig. 3B**). CD38, a cell surface  
20 ectoenzyme, is well-known in myeloma as the target of the monoclonal antibodies  
21 (mAbs) daratumumab and isatuximab (32). While CD38 has been proposed as a  
22 standalone CAR-T target in myeloma, concern remains about toxicity given CD38  
23 expression on many other hematopoietic cells and increased potency of CAR-Ts at lower  
24 antigen densities when compared to mAbs (13). CD48/SLAMF2, a CD2 ligand, has been  
25 proposed as a therapeutic target in myeloma, with prior studies confirming that >90% of  
26 myeloma primary samples tested expressed CD48 (33). Notably, CD48, but not CD38,  
27 shows greater transcript expression on myeloma cell lines than any other tumor cell type  
28 in the CCLE (**Supp. Fig. 3C**). However, concerns about toxicity still arise with CD48  
29 monotherapy, given relatively high expression across other hematopoietic cells (33).  
30 Therefore, using either of these antigens as “locking on” handles, which do not activate

1 T-cells when engaged, may be the most effective way to deploy them in myeloma  
2 cellular therapy.

3 To evaluate which of these proteins is more highly expressed at the myeloma cell  
4 surface, and thus best-positioned to increase T-cell avidity, we used a calibrated  
5 fluorescence strategy by flow cytometry to measure absolute antigen density of both  
6 CD38 and CD48 expression. We evaluated myeloma cell lines (MM.1S, OPM-2, AMO-  
7 1) and primary bone marrow aspirate samples from 5 relapsed/refractory myeloma  
8 patients, selected on CD19-/CD138+ plasma cells. We found that both antigens were  
9 expressed at high copy number, consistent with our proteomic findings, but CD48  
10 showed the higher antigen density (range: 59,307-2,769,932 copies/cell vs. 16,251-  
11 613,422 for CD38) ( $p = 0.05$ ) (**Fig. 2F**; **Supp. Fig. 3D**). We thus conclude that CD48  
12 may be a particularly strong candidate for a potential “locking on” strategy to enhance the  
13 efficacy of BCMA-directed CAR-T’s.

14

### 15 **The myeloma surface proteome is remodeled in the context of proteasome inhibitor** 16 **resistance**

17 Having characterized the surface proteome of plasma cells at baseline, we next proposed  
18 that cataloging alterations in the context of proteasome inhibitor (PI) resistance may be  
19 relevant for diagnosing this condition, identifying new biological strategies to overcome  
20 resistance, or developing immunotherapies that selectively eliminate resistant disease. To  
21 this end, we performed cell surface proteomic profiling of AMO1, L363, and RPMI-8226  
22 myeloma cell lines previously described to be *in vitro*-evolved for resistance to either  
23 carfilzomib (CfzR) or bortezomib (BtzR) (34) (**Fig. 3A**; **Supp Fig. 4A-B**,  
24 **Supplementary Dataset 3**). Serving as a positive control, the drug efflux pump MDR1  
25 (*ABCB1*) was by far the most increased surface protein in CfzR cells, consistent with our  
26 prior results from whole cell shotgun proteomics (35, 36) (**Supp. Fig. 4C**). Aggregating  
27 BtzR vs. wild-type data, though, we saw no change in MDR1 (**Supp. Fig. 4D**), consistent  
28 with prior findings (35). Instead, across both CfzR and BtzR comparisons we found a  
29 signature whereby CD50, CD361/EVI2B, CD53, and Integrin-b7 (ITGB7) were  
30 commonly decreased while CD10 and CD151 were increased versus parental. Compared  
31 to RNA-seq (**Supplementary Dataset 4**), several genes showed evidence of possible

1 post-transcriptional regulation; CD151, for example, showed >2.5-fold increased surface  
2 protein but essentially no transcript change in AMO1-BtzR cells (**Supp. Fig. 4E**). We did  
3 not identify significant upregulation of any current myeloma immunotherapy target  
4 proteins (**Supplementary Dataset 3**). Furthermore, with the possible exception of CD10,  
5 we did not identify signatures suggestive of de-differentiation to a more B-cell-like  
6 surface protein profile (37).

7 Flow cytometry largely validated the extensive surface remodeling uncovered by  
8 our proteomic dataset, confirming prominent alterations in CD53, EVI2B, CD50, CD10,  
9 and CD151 in both AMO1 (**Fig. 3B**) and RPMI-8226 (**Supp. Fig. 4F**) PI-resistant cells.  
10 Our previous analysis indicated that CD53, EVI2B, and CD10 cell surface levels were  
11 transcriptionally regulated (**Supp. Fig. 4E**). Therefore, to investigate relevance to  
12 myeloma patients, we interrogated mRNA expression in paired pre- and post-first relapse  
13 tumor cells in the MMRF CoMMpass dataset (release IA14). 94% of these CoMMpass  
14 patients were treated with PI as part of their induction regimen. Consistent with our  
15 proteomic findings, in relapsed myeloma patient tumor cells we found significant  
16 transcript decreases of *CD53* and *EVI2B*, while *MME* (CD10) showed a significant  
17 increase (**Fig. 3C**). *CD151* showed a non-significant increase, though in the context of  
18 post-transcriptional regulation protein-level increase could potentially be higher. We  
19 further developed an immunohistochemistry (IHC) assay for CD53, confirming decrease  
20 on plasma cells in bone marrow core biopsies ( $n = 13$ ) in paired diagnosis and relapse  
21 specimens after a PI-containing regimen (**Fig. 3D**). We further noted that these markers  
22 appeared to carry prognostic relevance at diagnosis in the CoMMpass cohort (**Supp. Fig.**  
23 **4G**). From a biological perspective, alterations in these surface proteins may influence  
24 the phenotype of PI-refractory myeloma. For example, both CD53 (38) and CD151 (39)  
25 may impact tumor interaction with the microenvironment. Taken together, these markers  
26 warrant further investigation in the context of assessing and monitoring PI resistance.

27

### 28 **Lenalidomide evolved resistance leads to increased CD33 and CD45/PTPRC on** 29 **myeloma cells**

30 We further probed surface proteomic changes in the context of evolved resistance to  
31 lenalidomide (Len), a thalidomide analog used in both the standard front-line regimen for

1 myeloma patients and maintenance monotherapy. To our knowledge, surface changes  
2 resulting from Len resistance have not been previously characterized. We performed CSC  
3 proteomics on OPM2 and H929 cell lines *in vitro*-evolved to become resistant to  
4 lenalidomide (LenR) relative to their WT counterparts (40). While we found broad  
5 surface proteomic changes in both cell lines, there was relatively little overlap between  
6 the two (**Fig. 4A**). The most notable common signature was increased CD33 and  
7 CD45/PTPRC in both LenR cell lines (**Fig. 4A**). Examining CoMMpass data, we  
8 confirmed both *CD33* and *PTPRC* transcripts to be significantly increased at first relapse  
9 vs. diagnosis in patient tumor cells (**Fig. 4B**). Plasma cell expression of either of these  
10 markers has already been proposed as a poor prognostic factor in newly-diagnosed  
11 myeloma (41, 42), potentially consistent with more aggressive disease biology after Len  
12 resistance. In terms of therapeutic targeting, while CD45 is expressed at high levels on  
13 essentially all non-plasma cell leukocytes, CD33 is a well-known surface target enriched  
14 in myeloid malignancies (43). However, by CSC profiling, CD33 shows low mass  
15 spectrometric intensity on myeloma plasma cells (**Supp. Dataset 1**), suggestive of low  
16 surface protein expression. Furthermore, per Human Blood Atlas data *CD33* mRNA  
17 expression on B-lineage cells is expected to be much lower than that on myeloid cells  
18 (**Supp. Fig. 4H**). “On target, off tumor” toxicity on non-malignant cells expressing CD33  
19 is already a considerable concern in treatment of myeloid leukemias (44). Taken together,  
20 targeting CD33 to selectively eliminate Len-resistant myeloma is unlikely to be  
21 straightforward. However, there may be opportunities to generate dual-targeting cellular  
22 therapies or other immunotherapeutics to take advantage of this increased CD33  
23 expression in Len-resistant disease.

24

## 25 **Short term drug treatment leads to divergent surface profiles from evolved** 26 **resistance**

27 Another potential strategy to take advantage of the myeloma surfaceome is to consider  
28 co-treatment approaches of small molecules and immunotherapies. For example, our  
29 group (45) and others (46-48) have used small molecules to increase expression of CD38  
30 on myeloma plasma cells to enhance efficacy of daratumumab. Other examples include  
31 small molecule treatment to boost surface BCMA in myeloma (49, 50) or CD22 in B-

1 ALL (51). Furthermore, it has been suggested that acute responses to PI treatment, in  
2 particular marked chaperone upregulation and ER stress response, may translate into  
3 mechanisms of long-term cellular adaptation and resistance (52-54). We therefore  
4 examined the effects of short-term (48 hr) Btz and Len treatment on the myeloma  
5 surfaceome (**Supplementary Dataset 5**).

6 We first noted that surface protein changes after acute Btz treatment at 7.5 nM for  
7 48 hr in RPMI-8226 cells, when compared to BtzR vs. WT data aggregated across cell  
8 lines, did not show significant correlation ( $R = -0.056$ ;  $p = 0.058$ ) (**Fig. 5A**). The most  
9 apparent commonalities were in down-regulated proteins, including CD53, NCAM2, and  
10 SEMA4A. While we did not observe an increase in any current immunotherapy targets  
11 after acute Btz treatment, we surprisingly noted a decrease in surface BCMA in RPMI-  
12 8226 cells (**Fig. 5B**). We further confirmed this finding in another cell line, MM.1S, by  
13 flow cytometry (**Supp. Fig. 5A-B**).

14 We similarly investigated short term treatment with Len. After 48 hr of 50 uM  
15 treatment in AMO-1 we again found broad alterations to the surfaceome (**Fig. 5C**). We  
16 did not observe any alteration in CD33 or PTPRC/CD45. However, among the most  
17 upregulated proteins was Mucin-1 (*MUC1*), a known therapeutic target in multiple  
18 myeloma (55). By flow cytometry we confirmed MUC1 surface changes after short term  
19 Len in both AMO-1 as well as primary CD138+ plasma cells from two patients (**Fig.**  
20 **5D**). Additionally, in RPMI-8226 cells, mass spectrometry and flow cytometry identified  
21 GITR, a potential tumor suppressor in myeloma (63), as upregulated under Len treatment  
22 (**Supp. Fig. 5C-D**).

23 We further probed treatment with two other agents targeting protein homeostasis  
24 that have been preclinically investigated in myeloma: the p97 inhibitor CB-5083 (56) and  
25 the allosteric HSP70 inhibitor JG342 (57, 58) (**Supp. Fig. 5E-G**). We found that surface  
26 proteomic signatures were largely unique to both these agents, showing minimal overlap  
27 with PI treatment.

28 Intriguingly, myeloma surface markers show wide variability in expression  
29 changes when aggregated across drug treatment conditions (**Supp. Fig. 5H**). For  
30 example, TXNDC11 and CCR10 protein levels appear stable across drug treatments in  
31 comparison to canonical myeloma markers BCMA and CD138/SDC1. Some proteins,

1 including ITGB6, consistently exhibit large changes in surface expression after drug  
2 treatment, suggesting that they might be regulated by common stress pathways in  
3 myeloma cells.

4 Together, these findings confirm that acute drug treatment and long-term  
5 resistance lead to rare commonalities but in general largely divergent effects on the  
6 myeloma surfaceome. Furthermore, our results suggest that in some settings Btz co-  
7 treatment may decrease efficacy of BCMA-targeted therapy, whereas Len co-treatment  
8 may enhance utility of MUC1-directed treatments.

9

### 10 **“Micro” method for streamlined surface proteomics**

11 Ideally, our surface proteomic analyses here would be performed on primary myeloma  
12 tumor specimens instead of cell lines. However, one significant limitation of the standard  
13 CSC method is the requirement for large sample inputs, typically 30e6-200e6 cells (4,  
14 11). In other cancers, this requirement has largely restricted surface proteomic analyses to  
15 model systems (20, 59). To our knowledge, no surface proteomic profiling has previously  
16 been performed using primary myeloma tumor cells.

17 We sought to develop a miniaturized CSC method amenable to reduced sample  
18 inputs, thereby allowing for more ready application to primary samples. We reasoned that  
19 adapting the “InStageTip” strategy could meet this need (60). This “one pot” approach,  
20 which minimizes sample losses during processing by eliminating many steps of handling  
21 and vessel transfer, was previously shown to allow for large decreases in shotgun  
22 proteomic sample input on whole-cell lysates.

23 In our adaptation of this method for cell surface proteomic profiling, following  
24 surface biotinylation of live cells, streptavidin bead capture, and bead washes, all steps  
25 are performed in a single P200 tip (**Fig. 6A**). We first applied this “micro” method to  
26 RS4;11 B-ALL cells, comparing 1e6 cellular input to 30e6 input in the standard  
27 (“macro”) method. With the micro method, by MaxQuant analysis we were able to  
28 quantify 662 and 645 proteins in each replicate, compared to 725 and 774, respectively,  
29 with the standard macro method with 30x greater input. We further saw consistent  
30 quantification between the micro and macro method ( $R = 0.84$ ) and excellent quantitative

1 reproducibility between biological replicates of the micro method on 1e6 cells ( $R = 0.98$ )  
2 (**Fig. 6B-C**).

3 Encouraged by these results, we next evaluated the head-to-head performance of  
4 the micro vs. macro method in AMO-1 myeloma cells across a range of inputs (30e6,  
5 10e6, 1e6 cells). In this follow-up experiment, the benefits of the micro prep on protein  
6 yield were not as pronounced, with only a modest increase in membrane protein  
7 identification with 1e6 cells versus the standard macro prep (**Supp. Fig. 6A**).

8 Furthermore, we noted a marked drop-off in membrane protein identifications from 30e6  
9 to 1e6 cells with micro method, with only 40% and 35% of membrane protein IDs at the  
10 lower input in each replicate, respectively (**Supp. Fig. 6A**).

11 Even though we could not consistently obtain a dramatic increase in membrane  
12 protein identifications at the lower sample input, it still appears that the micro method  
13 carries at least some advantage in protein identifications over the standard macro protocol  
14 on low sample inputs. Furthermore, the “one pot” approach markedly streamlines the  
15 overall workflow by eliminating additional steps requiring transfer of the sample from  
16 one vessel to another.

17 We therefore attempted to apply our micro CSC method to primary myeloma  
18 plasma cells. We titrated cellular inputs obtained from a relapsed patient with a malignant  
19 pleural effusion, from which we isolated ~50e6 CD138+ plasma cells with magnetic bead  
20 selection. While we found a marked decrease in membrane protein identifications from  
21 25e6 to 1e6 primary cells (**Fig. 6D**), the micro approach on 5e6 cellular input still  
22 enabled quantification of 327 membrane-annotated proteins, of which 216 were high  
23 confidence plasma membrane proteins, on this primary tumor sample (**Fig. 6E**,  
24 **Supplementary Dataset 6**). Furthermore, the micro “one pot” approach on 25e6 cellular  
25 input quantified 868 total membrane-annotated proteins, of which 483 were high  
26 confidence plasma membrane proteins (**Fig. 6E**, **Supplementary Dataset 6**), and  
27 identified essentially all of the antigens of interest previously identified in our cell line  
28 studies. We further found a strong positive correlation ( $R = 0.51$ ;  $p < 1e4$ ) between  
29 surface protein quantification in myeloma cell lines and in this primary sample, with very  
30 few surface proteins found on the primary sample not identified in myeloma cell lines

1 (Supp. Fig. 6B). This overall similarity to the surface proteomic landscape of a primary  
2 tumor underscores the utility of our profiling in myeloma cell lines above.

3

#### 4 DISCUSSION

5 Here we used a proteomic approach to delineate the cell surface landscape of  
6 multiple myeloma plasma cells. Our results characterize the distinct myeloma cell surface  
7 repertoire as well as define surfaceome remodeling in the context of resistance to and  
8 acute treatment with commonly used small molecule therapeutics. Our findings suggest  
9 new immunotherapy targets in this disease, reveal possible biomarkers of resistance, and  
10 provide a unique resource for probing plasma cell biology given the numerous  
11 physiologic processes governed by cell surface proteins. Furthermore, we modify a  
12 common cell surface proteomic method which, with further refinement, may more readily  
13 expand “surfaceome” profiling to primary tumor samples.

14 Notably, our dataset is valuable as it extends to far more proteins simultaneously  
15 than are accessible by flow cytometry or CyTOF. On the other hand, for surface proteins  
16 present at low copy number, or with no glycosylation, sensitivity of detection by CSC  
17 proteomics is certainly lower than these other approaches. Furthermore, we cannot  
18 exclude the possibility of false positive hits due to background intracellular protein  
19 labeling. Therefore, this broad dataset ultimately serves as an important complement to  
20 targeted antibody-based approaches.

21 We believe that particular utility of this resource comes from its ability to identify  
22 surface proteomic signatures that could not be predicted from RNA-seq alone. For  
23 example, our identification of surface proteins most highly expressed on plasma cells  
24 (Fig. 2C-E) cannot be directly extrapolated from transcriptome data. Furthermore, we  
25 find evidence of potential post-transcriptional regulation of many surface proteins in the  
26 drug-resistant setting (Supp. Fig. 4E).

27 We further integrate our proteomic data with RNA-based datasets to assist in the  
28 identification of new immunotherapy targets in myeloma (Fig. 2A). Our two hits we  
29 specifically examine, CCR10 and TXNDC11, while promising, still require significant  
30 additional validation as possible targets. We note that given prior data suggesting ER-  
31 localized biology, TXNDC11 in particular may not have been considered as a possible



1 immunotherapeutic target without our proteomic dataset in hand. Other antigens  
2 emerging from our scoring system may also have significant promise and stand as a  
3 resource for others in the community. In parallel, modulating CAR binding avidity has  
4 recently been proposed as a method to precisely tune CAR-T activation (61). Our  
5 proposal to use CD48/SLAMF2 binding to increase avidity, and thereby extend  
6 functional activity, of BCMA CAR-Ts requires future experimental exploration.

7 We do note that as we were finalizing this work, another group also performed  
8 surface proteomics on a series of myeloma cell lines, as well as targeted whole-cell lysate  
9 proteomics from primary myeloma samples (62). In their limited analysis they point out  
10 several surface proteins expressed on plasma cells that are being targeted in other  
11 malignancies, including CD5, CD147 (*BSG*), LY75 (*LY75*), CD98hc (*SLC3A2*), and  
12 CD166 (*ALCAM*). However, based on our scoring metrics (**Supplementary Dataset 2**),  
13 all of these appear to be poor cellular therapy targets (score <8) for myeloma due to low  
14 plasma cell specificity and high likelihood of on-target, off-tumor toxicity. We believe  
15 that our integrated bioinformatic analysis provides a much more robust resource for the  
16 development of new myeloma therapies.

17 In terms of study limitations, due to the sample input required for cell surface  
18 proteomics, the large majority of our surface profiling is performed in myeloma cell  
19 lines. While we know these models are only partially representative of true patient tumors  
20 (63), our identification of nearly all canonical myeloma surface markers and  
21 immunotherapy targets on cell lines (**Fig. 1C**; **Fig. 6E**; **Supp. Fig. 6B**) increases  
22 confidence in the broader applicability of our findings. In addition, many of the drug-  
23 resistance or drug-treatment signatures we identified were consistent with those observed  
24 in primary patient tumors, either at the transcript (MMRF CoMMpass) or protein (our  
25 studies here) level. However, validating the clinical utility of novel surface biomarkers of  
26 drug resistance, as well as the potential relevance to small molecule or  
27 immunotherapeutic co-treatment strategies (for example, the combination of  
28 lenalidomide and MUC1-directed therapy) awaits further investigation.

29 To this point above, broadly extending surface proteomic profiling to primary  
30 plasma cells would certainly be a boon for myeloma research. Our miniaturization of the  
31 CSC method provides a small step toward allowing more routine profiling of primary

1 samples, but further optimization is clearly needed. Recently, a method utilizing  
2 automated liquid handlers was described, obtaining high-quality data from only 1e6  
3 murine B-cells (64). While this approach is not necessarily optimal as it requires  
4 specialized equipment only available in a handful of labs, such approaches may  
5 demonstrate a way forward for more routine “surfaceome” profiles of patient plasma  
6 cells. However, we still believe that the “micro” method will carry advantages for other  
7 groups performing surface proteomics given a streamlined protocol and no apparent  
8 disadvantages versus the macro method. Notably, we used our adapted micro method to  
9 proteomically profile the cell surface of a myeloma primary sample for the first time.  
10 Overall, our data supports the notion that our resource remains highly useful for  
11 generating hypotheses and motivating further investigation in myeloma.

12 In conclusion, we provide a unique resource for the myeloma research  
13 community, identifying new surface markers with potential biological, diagnostic, and  
14 therapeutic relevance. Through further method advancement, our goal is to ultimately  
15 bring this powerful approach to more widespread use in basic, translational, and clinical  
16 studies in myeloma.

17

## 18 **ACKNOWLEDGEMENTS**

19 We thank the UCSF myeloma patients and their families who allowed their tissue  
20 specimens to be utilized for research in this study. This research was supported by R01  
21 CA226851, DP2 OD022552, the Gabrielle’s Angel Foundation for Cancer Research, and  
22 the UCSF Stephen and Nancy Grand Multiple Myeloma Translational Initiative (to  
23 A.P.W.), and Celgene UCSF A125812, P41 CA196276, R35 GM122451, and the Harry  
24 and Dianna Hind Professorship (to J.A.W.).

25

## 26 **AUTHOR CONTRIBUTIONS:**

27 I.D.F., S.T.T, J.A.W., and A.P.W. conceived and designed the study. I.D.F., B.P.E.,  
28 S.T.T, Y-H.L., M.N., K.K.L., and P.C. performed experiments and analyzed data. M.H.  
29 analyzed data. E.R., S.V., and S.P. performed and analyzed immunohistochemistry. A.L.-  
30 G., L.B., and C.D. contributed reagents. N.S., S.W.W., J.L.W., and T.G.M. enrolled

1 patients in tissue banking protocol and provided primary patient samples. I.D.F. and  
2 A.P.W. wrote the manuscript with input from all authors.

3

4 **CONFLICT OF INTEREST:**

5 A.P.W. is a member of the Scientific Advisory Board and holds equity stakes in Indapta  
6 Therapeutics and Protocol Intelligence, LLC. J.A.W. is on the Scientific Advisory Board  
7 and holds equity stakes in the following companies with oncology interests: Soteria  
8 Biotherapeutics, Jnana Therapeutics, Inception Therapeutics, and Inzen Therapeutics, and  
9 holds a sponsored research agreement with Bristol Myers Squibb. S.W.W. has received  
10 research funding from Janssen, GlaxoSmithKline, Bristol Myers Squibb, Genentech, and  
11 Fortis, and served as a consultant to Amgen. T.G.M. has received research funding from  
12 Sanofi, Janssen, and Amgen and has served as a consultant to GlaxoSmithKline. A. L.-G.  
13 is an employee and shareholder of Celgene/Bristol Myers Squibb. P.C. is currently an  
14 employee and shareholder of Roche/Genentech but was solely employed by UCSF during  
15 her participation on this project. The other authors declare no relevant conflicts of  
16 interest.

17

18

19

## 1 REFERENCES:

- 2 1. M. Ghandi *et al.*, Next-generation characterization of the Cancer Cell Line  
3 Encyclopedia. *Nature* **569**, 503-508 (2019).
- 4 2. Y. Liu, A. Beyer, R. Aebersold, On the Dependency of Cellular Protein Levels on  
5 mRNA Abundance. *Cell* **165**, 535-550 (2016).
- 6 3. P. Choudhry, D. Galligan, A. P. Wiita, Seeking Convergence and Cure with New  
7 Myeloma Therapies. *Trends Cancer* **4**, 567-582 (2018).
- 8 4. D. Bausch-Fluck *et al.*, A mass spectrometric-derived cell surface protein atlas.  
9 *PLoS One* **10**, e0121314 (2015).
- 10 5. S. C. Bendall *et al.*, Single-cell mass cytometry of differential immune and drug  
11 responses across a human hematopoietic continuum. *Science* **332**, 687-696  
12 (2011).
- 13 6. T. Paino *et al.*, Phenotypic identification of subclones in multiple myeloma with  
14 different chemoresistant, cytogenetic and clonogenic potential. *Leukemia* **29**,  
15 1186-1194 (2015).
- 16 7. J. Flores-Montero *et al.*, Immunophenotype of normal vs. myeloma plasma cells:  
17 Toward antibody panel specifications for MRD detection in multiple myeloma.  
18 *Cytometry. Part B, Clinical cytometry* **90**, 61-72 (2016).
- 19 8. L. B. Baughn *et al.*, Phenotypic and functional characterization of a bortezomib-  
20 resistant multiple myeloma cell line by flow and mass cytometry. *Leukemia*  
21 *Lymphoma* **58**, 1931-1940 (2017).
- 22 9. D. R. Glass *et al.*, An Integrated Multi-omic Single-Cell Atlas of Human B Cell  
23 Identity. *Immunity* **53**, 217-232 e215 (2020).
- 24 10. D. Bausch-Fluck *et al.*, The in silico human surfaceome. *Proc Natl Acad Sci U S*  
25 *A* **115**, E10988-E10997 (2018).
- 26 11. B. Wollscheid *et al.*, Mass-spectrometric identification and relative quantification  
27 of N-linked cell surface glycoproteins. *Nat Biotechnol* **27**, 378-386 (2009).
- 28 12. S. Tyanova, T. Temu, J. Cox, The MaxQuant computational platform for mass  
29 spectrometry-based shotgun proteomics. *Nat Protoc* **11**, 2301-2319 (2016).
- 30 13. L. G. Rodriguez-Lobato *et al.*, CAR T-Cells in Multiple Myeloma: State of the  
31 Art and Future Directions. *Front Oncol* **10**, 1243 (2020).
- 32 14. E. L. Smith *et al.*, GPRC5D is a target for the immunotherapy of multiple  
33 myeloma with rationally designed CAR T cells. *Sci Transl Med* **11** (2019).
- 34 15. R. Aebersold, M. Mann, Mass-spectrometric exploration of proteome structure  
35 and function. *Nature* **537**, 347-355 (2016).
- 36 16. C. G. Gahmberg, M. Tolvanen, Why mammalian cell surface proteins are  
37 glycoproteins. *Trends Biochem Sci* **21**, 308-311 (1996).
- 38 17. M. A. Nix *et al.*, In vitro-selected nanobody-based cellular therapy targeting  
39 CD72 for treatment of refractory B-cell malignancies. *Blood* **134** (Supplement\_1)  
40 (ASH Abstract), 1337 (2019).
- 41 18. C. Pellat-Deceunynck *et al.*, Human myeloma cell lines as a tool for studying the  
42 biology of multiple myeloma: a reappraisal 18 years after. *Blood* **86**, 4001-4002  
43 (1995).
- 44 19. F. Vogiatzi *et al.*, Daratumumab eradicates minimal residual disease in a  
45 preclinical model of pediatric T-cell acute lymphoblastic leukemia. *Blood* **134**,  
46 713-716 (2019).

- 1 20. A. J. Martinko *et al.*, Targeting RAS-driven human cancer cells with antibodies to  
2 upregulated and essential cell-surface proteins. *Elife* **7** (2018).
- 3 21. T. Nakayama *et al.*, Cutting edge: profile of chemokine receptor expression on  
4 human plasma cells accounts for their efficient recruitment to target tissues. *J*  
5 *Immunol* **170**, 1136-1140 (2003).
- 6 22. T. Mohan, L. Deng, B. Z. Wang, CCL28 chemokine: An anchoring point bridging  
7 innate and adaptive immunity. *Int Immunopharmacol* **51**, 165-170 (2017).
- 8 23. G. George *et al.*, EDEM2 stably disulfide-bonded to TXNDC11 catalyzes the first  
9 mannose trimming step in mammalian glycoprotein ERAD. *eLife* **9** (2020).
- 10 24. R. T. Timms *et al.*, Genetic dissection of mammalian ERAD through comparative  
11 haploid and CRISPR forward genetic screens. *Nat Commun* **7**, 11786 (2016).
- 12 25. L. Rasche *et al.*, The natural human IgM antibody PAT-SM6 induces apoptosis in  
13 primary human multiple myeloma cells by targeting heat shock protein GRP78.  
14 *PloS one* **8**, e63414 (2013).
- 15 26. P. J. Thul *et al.*, A subcellular map of the human proteome. *Science* **356** (2017).
- 16 27. J. X. Binder *et al.*, COMPARTMENTS: unification and visualization of protein  
17 subcellular localization evidence. *Database* **2014**, bau012 (2014).
- 18 28. A. Tsherniak *et al.*, Defining a Cancer Dependency Map. *Cell* **170**, 564-576 e516  
19 (2017).
- 20 29. R. G. Majzner *et al.*, Tuning the Antigen Density Requirement for CAR T-cell  
21 Activity. *Cancer Discov* **10**, 702-723 (2020).
- 22 30. M. Hamieh *et al.*, CAR T cell trogocytosis and cooperative killing regulate  
23 tumour antigen escape. *Nature* **568**, 112-116 (2019).
- 24 31. R. C. Lynn *et al.*, c-Jun overexpression in CAR T cells induces exhaustion  
25 resistance. *Nature* **576**, 293-300 (2019).
- 26 32. H. M. Lokhorst *et al.*, Targeting CD38 with Daratumumab Monotherapy in  
27 Multiple Myeloma. *N Engl J Med* **373**, 1207-1219 (2015).
- 28 33. N. Hosen *et al.*, CD48 as a novel molecular target for antibody therapy in multiple  
29 myeloma. *Br J Haematol* **156**, 213-224 (2012).
- 30 34. L. Besse *et al.*, A metabolic switch in proteasome inhibitor-resistant multiple  
31 myeloma ensures higher mitochondrial metabolism, protein folding and  
32 sphingomyelin synthesis. *Haematologica* **104**, e415-e419 (2019).
- 33 35. G. P. Soriano *et al.*, Proteasome inhibitor-adapted myeloma cells are largely  
34 independent from proteasome activity and show complex proteomic changes, in  
35 particular in redox and energy metabolism. *Leukemia* 10.1038/leu.2016.102  
36 (2016).
- 37 36. A. Besse *et al.*, Carfilzomib resistance due to ABCB1/MDR1 overexpression is  
38 overcome by nelfinavir and lopinavir in multiple myeloma. *Leukemia* **32**, 391-401  
39 (2018).
- 40 37. C. Leung-Hagesteijn *et al.*, Xbp1s-negative tumor B cells and pre-plasmablasts  
41 mediate therapeutic proteasome inhibitor resistance in multiple myeloma. *Cancer*  
42 *Cell* **24**, 289-304 (2013).
- 43 38. K. A. Beckwith, J. C. Byrd, N. Muthusamy, Tetraspanins as therapeutic targets in  
44 hematological malignancy: a concise review. *Front Physiol* **6**, 91 (2015).

- 1 39. R. Sadej, A. Grudowska, L. Turczyk, R. Kordek, H. M. Romanska, CD151 in  
2 cancer progression and metastasis: a complex scenario. *Lab Invest* **94**, 41-51  
3 (2014).
- 4 40. A. Lopez-Girona *et al.*, Cereblon is a direct protein target for immunomodulatory  
5 and antiproliferative activities of lenalidomide and pomalidomide. *Leukemia* **26**,  
6 2326-2335 (2012).
- 7 41. H. Shim *et al.*, Expression of myeloid antigen in neoplastic plasma cells is related  
8 to adverse prognosis in patients with multiple myeloma. *Biomed Res Int* **2014**,  
9 893243 (2014).
- 10 42. P. Arana *et al.*, Prognostic value of antigen expression in multiple myeloma: a  
11 PETHEMA/GEM study on 1265 patients enrolled in four consecutive clinical  
12 trials. *Leukemia* **32**, 971-978 (2018).
- 13 43. C. D. Godwin, R. P. Gale, R. B. Walter, Gemtuzumab ozogamicin in acute  
14 myeloid leukemia. *Leukemia* **31**, 1855-1868 (2017).
- 15 44. M. Y. Kim *et al.*, Genetic Inactivation of CD33 in Hematopoietic Stem Cells to  
16 Enable CAR T Cell Immunotherapy for Acute Myeloid Leukemia. *Cell* **173**,  
17 1439-1453 e1419 (2018).
- 18 45. P. Choudhry *et al.*, DNA methyltransferase inhibitors upregulate CD38 protein  
19 expression and enhance daratumumab efficacy in multiple myeloma. *Leukemia*  
20 **34**, 938-941 (2020).
- 21 46. P. L. Fedele *et al.*, IMiDs prime myeloma cells for daratumumab-mediated  
22 cytotoxicity through loss of Ikaros and Aiolos. *Blood* **132**, 2166-2178 (2018).
- 23 47. E. Garcia-Guerrero *et al.*, Panobinostat induces CD38 upregulation and augments  
24 the antimyeloma efficacy of daratumumab. *Blood* **129**, 3386-3388 (2017).
- 25 48. I. S. Nijhof *et al.*, Upregulation of CD38 expression on multiple myeloma cells by  
26 all-trans retinoic acid improves the efficacy of daratumumab. *Leukemia* **29**, 2039-  
27 2049 (2015).
- 28 49. M. J. Pont *et al.*, gamma-Secretase inhibition increases efficacy of BCMA-  
29 specific chimeric antigen receptor T cells in multiple myeloma. *Blood* **134**, 1585-  
30 1597 (2019).
- 31 50. P. Ramkumar *et al.*, CRISPR-based screens uncover determinants of  
32 immunotherapy response in multiple myeloma. *Blood Adv* **4**, 2899-2911 (2020).
- 33 51. S. Ramakrishna *et al.*, Modulation of Target Antigen Density Improves CAR T-  
34 cell Functionality and Persistence. *Clin Cancer Res* **25**, 5329-5341 (2019).
- 35 52. S. P. Shah, S. Lonial, L. H. Boise, When Cancer Fights Back: Multiple Myeloma,  
36 Proteasome Inhibition, and the Heat-Shock Response. *Mol Cancer Res* **13**, 1163-  
37 1173 (2015).
- 38 53. N. Nikesitch, S. C. Ling, Molecular mechanisms in multiple myeloma drug  
39 resistance. *J Clin Pathol* **69**, 97-101 (2016).
- 40 54. A. P. Wiita *et al.*, Global cellular response to chemotherapy-induced apoptosis.  
41 *eLife* **2**, e01236 (2013).
- 42 55. L. Yin, M. Kosugi, D. Kufe, Inhibition of the MUC1-C oncoprotein induces  
43 multiple myeloma cell death by down-regulating TIGAR expression and  
44 depleting NADPH. *Blood* **119**, 810-816 (2012).

- 1 56. R. Le Moigne *et al.*, The p97 inhibitor CB-5083 is a unique disrupter of protein  
2 homeostasis in models of Multiple Myeloma. *Mol Cancer Therap* 10.1158/1535-  
3 7163.MCT-17-0233 (2017).
- 4 57. X. Li *et al.*, Validation of the Hsp70-Bag3 protein-protein interaction as a  
5 potential therapeutic target in cancer. *Mol Cancer Therap* **14**, 642-648 (2015).
- 6 58. I. D. Ferguson *et al.*, Allosteric HSP70 inhibitors perturb mitochondrial  
7 proteostasis and overcome proteasome inhibitor resistance in multiple myeloma.  
8 *bioRxiv* doi.org/10.1101/2020.04.21.052456 (2020).
- 9 59. P. Mirkowska *et al.*, Leukemia surfaceome analysis reveals new disease-  
10 associated features. *Blood* **121**, e149-159 (2013).
- 11 60. J. Rappsilber, M. Mann, Y. Ishihama, Protocol for micro-purification, enrichment,  
12 pre-fractionation and storage of peptides for proteomics using StageTips. *Nat*  
13 *Protoc* **2**, 1896-1906 (2007).
- 14 61. B. Salzer *et al.*, Engineering AvidCARs for combinatorial antigen recognition and  
15 reversible control of CAR function. *Nat Commun* **11**, 4166 (2020).
- 16 62. R. A. A. Oldham *et al.*, Discovery and validation of surface N-glycoproteins in  
17 MM cell lines and patient samples uncovers immunotherapy targets. *J*  
18 *Immunother Cancer* **8** (2020).
- 19 63. V. Sarin *et al.*, Evaluating the efficacy of multiple myeloma cell lines as models  
20 for patient tumors via transcriptomic correlation analysis. *Leukemia*  
21 10.1038/s41375-020-0785-1 (2020).
- 22 64. M. van Oostrum *et al.*, Classification of mouse B cell types using surfaceome  
23 proteotype maps. *Nat Commun* **10**, 5734 (2019).
- 24 65. G. P. Soriano *et al.*, Proteasome inhibitor-adapted myeloma cells are largely  
25 independent from proteasome activity and show complex proteomic changes, in  
26 particular in redox and energy metabolism. *Leukemia* **30**, 2198-2207 (2016).
- 27 66. H. H. Huang *et al.*, Proteasome inhibitor-induced modulation reveals the  
28 spliceosome as a specific therapeutic vulnerability in multiple myeloma. *Nat*  
29 *Commun* **11**, 1931 (2020).
- 30 67. S. Tyanova *et al.*, The Perseus computational platform for comprehensive  
31 analysis of (prote)omics data. *Nat Methods* **13**, 731-740 (2016).
- 32 68. B. Schilling *et al.*, Platform-independent and label-free quantitation of proteomic  
33 data using MS1 extracted ion chromatograms in skyline: application to protein  
34 acetylation and phosphorylation. *Mol Cell Proteomics* **11**, 202-214 (2012).
- 35 69. Y. Perez-Riverol *et al.*, The PRIDE database and related tools and resources in  
36 2019: improving support for quantification data. *Nucleic Acids Res* **47**, D442-  
37 D450 (2019).
- 38 70. E. W. Deutsch *et al.*, The ProteomeXchange consortium in 2020: enabling 'big  
39 data' approaches in proteomics. *Nucleic Acids Res* **48**, D1145-D1152 (2020).
- 40
- 41

## 1 **METHODS**

### 2 **Cell Lines**

3 All cell lines were grown in RPMI-1640 media with 10% FBS. PI-resistant cells derived  
4 from cell lines AMO-1, L363, RPMI-8226, and ARH-77 were grown in 90 nM  
5 Bortezomib (Btz) or Carfilzomib (Cfz) as previously described (65). Lenalidomide-  
6 resistant cell lines H929 and OPM-2 were grown in increasing concentrations of  
7 lenalidomide and removed from drug for 5-7 days, as previously described (40), before  
8 use in cell surface proteomics. Cell lines were verified by DNA short tandem repeat  
9 testing and assessed as mycoplasma negative.

### 11 **Myeloma Patient Sample Processing**

12 Patient bone marrow samples (BM) were processed as previously described (66). Fresh  
13 de-identified primary myeloma patient BM samples were obtained from the UCSF  
14 Hematologic Malignancies Tissue Bank in accordance with the UCSF Committee on  
15 Human Research-approved protocols and the Declaration of Helsinki. BM mononuclear  
16 cells were isolated by density gradient centrifugation with Histopaque-1077 (Sigma  
17 Aldrich), and washed with 10 mL DPBS 3 times. For small molecule perturbation  
18 experiments, mononuclear cells were plated in IL-6 supplemented medium (RPMI1640,  
19 10% FBS, 1% penicillin/streptomycin, 2 mM glutamine, with 50ng/mL recombinant  
20 human IL-6 (ProSpec)) at 2e5 cells per well in a 96-well plate and incubated at 37°C, 5%  
21 CO<sub>2</sub> overnight prior to drug treatment and processing for flow cytometry as described  
22 below. For mass spectrometry, isolated mononuclear cells were taken directly from  
23 histopaque isolation into CD138 magnetic bead isolation and surface glycoprotein  
24 labeling as described below.

### 26 **Flow Cytometry**

27 Cells were resuspended in FACS buffer (5% FBS in D-PBS) and stained with antibodies  
28 for 1-2 hours on ice, washed with FACS buffer, and then resuspended in FACS buffer.  
29 For experiments where live cells populations were studied, cells were resuspended in  
30 FACS buffer. For analyses including live/dead stains, cells were resuspended in FACS  
31 buffer containing Sytox Green or Sytox Red (Thermo). For drug treatment experiments,  
32 cells were plated into 96 well plates and treated for 48 hours with compounds unless  
33 otherwise noted. For quantitative flow cytometry, antibodies used were FITC Mouse anti-  
34 human CD48 (BD Biosciences, clone TU145), FITC Mouse anti-human CD38 (BD  
35 Biosciences, clone HIT2), FITC Mouse IgG1k isotype control (BD Biosciences, clone  
36 27-35), and unstained respectively. using calibrated beads (Bangs Laboratories), 200 µL of  
37 FACS buffer + 1 drop of beads per well (one wells for “blank” beads, and other for  
38 FITC-Beads). Calibration curve for quantification beads were performed on the  
39 Quantitative software QuickCal v2.3. (Bangs Laboratories, Inc.) before FITC analysis on  
40 multiple myeloma cell lines. The following antibodies were used: CD138 (BD  
41 Biosciences, 562097, 552026), BCMA (BD Biosciences, 552026, BioLegend 357504),  
42 CD53 (BD Biosciences, 555508), CD10 (BD Biosciences, 561002), CD151 (BD  
43 Biosciences, 556057), CD50/ICAM3 (BD Biosciences, 555958), ITGB7 (BD  
44 Biosciences, 555945), GITR/CD357 (BioLegend 311604), MUC1/CD227 (BD  
45 Biosciences, 559774), CCR10 (BD Biosciences, clone 1B5). Isotype antibodies for



1 markers were ordered from BD Biosciences and BioLegend as per manufacturer  
2 recommendations.

### 3 4 **Drug treatments**

5 For cell surface proteomics experiments, 25e6 cells were seeded at 1e6/mL in T75 flasks  
6 and treated with compounds for 48 hours at the LD<sub>25</sub> dose. RPMI-8226 cells were treated  
7 with 50uM Lenalidomide (Sigma CDS022536), 7.5nM Bortezomib (SelleckChem), or  
8 300nM CB-5083 (gift of Cleave Biosciences). AMO1 cells were treated with 50uM  
9 Lenalidomide, 750nM JG-342 (gift of Jason Gestwicki, UCSF), or 250nM CB-5083. For  
10 flow cytometry experiments, cells were plated and treated in 96-well plates with the  
11 doses described in figure legends for 48 hours prior to flow cytometry analysis unless  
12 otherwise indicated.

### 13 14 **Cell surface proteomics sample preparation**

15 For all analyses except lenalidomide-resistant cell lines, 30e6 cells were collected for cell  
16 surface proteomics and washed twice with cold PBS. To oxidize glycoproteins, cells were  
17 incubated with 1.6mM Sodium metaperiodate (NaIO<sub>4</sub>) for 20 minutes with end-over-end  
18 rotation at 4°C in the dark, followed by three washes with ice cold PBS. To label  
19 oxidized glycoproteins, cells were incubated with 10mM Aniline and 1mM Biocytin  
20 hydrazide (Biotium, 90060) for 1.5 hours at 4°C with end-over-end rotation. Cells were  
21 washed three times with ice cold PBS, snap frozen in liquid nitrogen, and stored at -80C  
22 prior to processing. Pellets were lysed in 2x RIPA Buffer with HALT Protease Inhibitors  
23 (Thermo) and 2mM EDTA and sonicated on ice with occasional vortexing. Lysates were  
24 mixed with 500uL Neutravidin (Pierce, 29200) bead slurry and incubated on end over  
25 end rotary for 120 minutes at 4°C. Slurry was washed on columns with 50mLs each of  
26 three wash buffers as follows: first, 1x RIPA with 1mM EDTA, second, PBS with 1M  
27 NaCl, and third, 50mM ammonium bicarbonate with 2M Urea. Bead slurry was  
28 transferred to an eppendorf tube with 50mM Tris pH 8.5, 10mM TCEP, 20mM IAA,  
29 1.6M Urea. 2ug Trypsin was added to each sample for overnight digestion at RT.  
30 Supernatant contained digested peptides was removed from bead slurry and acidified (pH  
31 ~2) prior to desalting on SOLA columns or homemade C18 Stagetips. Eluted peptides  
32 were dried down by speedvac and resuspended in 2% ACN, 0.1% FA for mass  
33 spectrometry analysis. For lenalidomide-resistant cell line analysis using SILAC, all cell  
34 lines were grown were cultured in RPMI SILAC media (Thermo) supplemented with  
35 Dialyzed FBS for SILAC (Thermo) containing L-[<sup>13</sup>C<sub>6</sub>, <sup>15</sup>N<sub>2</sub>]lysine and L-[<sup>13</sup>C<sub>6</sub>, <sup>15</sup>N<sub>4</sub>]  
36 arginine (heavy label; Thermo) or L-[<sup>12</sup>C<sub>6</sub>, <sup>14</sup>N<sub>2</sub>]lysine and L-[<sup>12</sup>C<sub>6</sub>, <sup>14</sup>N<sub>4</sub>]arginine (light  
37 label, Thermo) for 5 passages to ensure full incorporation of the isotope labeling on cells.  
38 Briefly, 40x10<sup>6</sup> Len sensitive and resistant cells were harvested at 80% confluence,  
39 mixed at 1:1 cell count ratio, and subjected to the CSC protocol as described above to  
40 include all tryptic fragments. All experiments were performed in duplicate in both  
41 forward and reverse SILAC labeling scheme such that a total of four biological replicates  
42 were analyzed together.

### 43 44 **Macro-vs-Micro Cell Surface Proteomics**

45 AMO1 cells were counted and titrated into 3e7, 1e7, and 1e6 cells for cell-surface  
46 labeling. For harvesting, cells were washed twice with cold D-PBS (UCSF CCFAL001).

1 For cell-surface labeling, the samples were re-suspended in 990  $\mu$ L cold D-PBS and  
2 transferred to a 1.5-mL amber tube. Next, they were oxidized by the addition of 10  $\mu$ L  
3 160mM NaIO<sub>4</sub> (Thermo 1379822) and incubated on a rotisserie at 4°C for 20 minutes.  
4 Three spin washes were performed each with 1 mL cold D-PBS at 300g for 5 minutes to  
5 remove the oxidizing reagent. For chemical labeling, cell pellets were re-suspended in 1  
6 mL cold D-PBS followed by the addition of 1  $\mu$ L of aniline (Sigma-Aldrich 242284) and  
7 10  $\mu$ L biocytin hydrazide (Biotium 90060). Samples were incubated at 4°C for 60  
8 minutes on a rotisserie followed by three more spin washes with cold D-PBS. After the  
9 final wash, supernatant was removed, and cell pellet were snap frozen and stored in -  
10 80°C. Labeling was repeated for duplicate samples for the two protocols.

11  
12 For both micro and macro protocols, labeled cell pellets were lysed in 500  $\mu$ L buffer  
13 containing 2X RIPA (Millipore 20-188), 1X HALT protease inhibitor (Thermo 78430),  
14 and 2 mM EDTA. Lysates were sonicated at 1-Hz pulses for 30 seconds with a probe  
15 sonicator and incubated on ice for 10 minutes. To remove precipitates, samples were  
16 spun at 17,200g for 10 minutes at 4°C. To prepare for enrichment of biotinylated  
17 proteins, 100, 80, 60 of High Capacity NeutrAvidin slurry (Thermo PI29204) were  
18 washed three times with 1 mL 2X RIPA/1mM EDTA buffer in 2-mL chromatography  
19 columns (Bio-Rad 7326008) attached to a vacuum manifold (Promega A7231). Clarified  
20 lysates were then transferred to the chromatography column (3e7, 1e7, 1e6 cell inputs  
21 into 100, 80, 60 slurry, respectively) and incubated at 4°C for 60 minutes on a rotisserie.  
22 For the macro protocol, protein-bound beads were transferred to a 10-mL  
23 chromatography column (Bio-Rad 7311550) and washed with the following buffers: 50  
24 mL 1x RIPA/1mM EDTA, 50 mL 1X PBS/1M NaCl, and 50 mL 2M urea/50mM  
25 ammonium bicarbonate (ABC). For the micro protocol, beads were transferred to a 2-mL  
26 chromatography column and washed with 5 mL of each buffer. For the macro protocol,  
27 rinsed beads were dried fully and transferred to a 1.5-mL tube using 100  $\mu$ L of digestion  
28 buffer containing 1.5M urea (VWR 97063-798), 50mM ABC, 10 mM 2-chloroacetamide  
29 (VWR 97064-926), and 5mM TCEP (GoldBio TCEP10). For the micro protocol, P200-  
30 StageTips were packed with four C18 disks (3M 14-386-2) and activated with 60  $\mu$ L  
31 methanol, 60  $\mu$ L 80% acetonitrile (ACN)/0.1% formic acid (FA), and twice with 60  $\mu$ L  
32 0.1% trifluoroacetic acid (TFA) prior to transferring the beads to the tip using 100  $\mu$ L of  
33 the digestion buffer. For protein digestion, trypsin/LysC (Promega PRV5073) was  
34 reconstituted to 1  $\mu$ g/ $\mu$ L with ultrapure water, and added to each sample (1500, 500, 50  
35 ng trypsin for 3e7, 1e7, 1e6 cell inputs, respectively). The macro samples were mixed at  
36 1000 RPM on an orbital shaker while the micro samples were wrapped in parafilm and  
37 placed on an end-to-end rotisserie at RT for the overnight digestion.

38  
39 For the macro protocol, the soluble fraction containing the tryptic peptides was separated  
40 from the beads by spinning at 1000g for one minute. Samples were then transferred to  
41 fresh tube and acidified with 10% TFA to reach a final concentration of 1% TFA. For  
42 desalting, C18 SOLA columns (Thermo 03150391) were activated with 500  $\mu$ L ACN and  
43 equilibrated twice with 500  $\mu$ L 0.1% TFA on a vacuum manifold. Acidified samples were  
44 passed through the column twice followed by two washes with 1000  $\mu$ L 0.1% TFA and  
45 one wash with 500  $\mu$ L 2% ACN/0.1% FA. Finally, peptides were eluted once with 150

1  $\mu\text{L}$  80% ACN/0.1% FA and again with 200  $\mu\text{L}$  80% ACN/0.1% FA. Samples were fully  
2 dried by SpeedVac and stored in  $-80^{\circ}\text{C}$ .

3

4 For the micro protocol, 10% TFA was added to each sample to reach a final  
5 concentration of 1% TFA. An initial peptide binding step was performed by spinning the  
6 acidified samples at 1000g prior to desalting three times with 100  $\mu\text{L}$  0.1% TFA. Peptides  
7 were then eluted twice with 50  $\mu\text{L}$  80% ACN/0.1% FA. Samples were fully dried by  
8 SpeedVac and stored in  $-80^{\circ}\text{C}$ .

9

## 10 **LC-MS/MS operation**

11 For all analyses except lenalidomide-resistant cell lines, 1  $\mu\text{g}$  of peptides were injected  
12 into a Dionex Ultimate 3000 NanoRSLC instrument with 15-cm Acclaim PEPMAP C18  
13 (Thermo) reverse phase column coupled to a Thermo Q Exactive Plus mass spectrometer.  
14 A linear gradient from 2.4% Acetonitrile to 40% Acetonitrile in 0.1% Formic Acid over  
15 195 minutes at flow rate of 0.2 $\mu\text{L}/\text{min}$  was employed, with an increase to 80%  
16 Acetonitrile for column wash prior to re-equilibration. For MS1 acquisition, spectra were  
17 collected in data dependent top 15 method with full MS scan resolution of 70,000, AGC  
18 target was set to 3e6, and maximum IT set to 100ms. For MS2 acquisition, resolution was  
19 set to 17,500, AGC set to 5e4, and maximum IT to 180ms. For lenalidomide-resistant cell  
20 line analysis using SILAC, data were collected on the Q-Exactive Plus in data-dependent  
21 mode using a top 20 method with dynamic exclusion of 35 secs and a charge exclusion  
22 setting that only sample peptides with a charge of 2, 3, or 4. Survey scans were collected  
23 as profile data with a resolution of 140,000 (at 200 m/z), AGC target of 3E6, maximum  
24 injection time of 120 ms, and scan range of 400 - 1800 m/z. MS2 scans were collected as  
25 centroid data with a resolution of 17,500 (at 200 m/z), AGC target of 5E4, maximum  
26 injection time of 60 ms with normalized collision energy at 27, and an isolation window  
27 of 1.5 m/z with an isolation offset of 0.5 m/z.

28

## 29 **Proteomic data analysis and quantification**

30 For all analyses except lenalidomide-resistant cell lines, mass spectrometry data was  
31 processed in Maxquant (12) (version 1.6.2.1) with settings as follows: enzyme specificity  
32 as trypsin with up to two missed cleavages, PSM/Protein FDR 0.01, cysteine  
33 carbidomethylation as fixed modification, methionine oxidation and N-terminal  
34 acetylation as variable modifications, minimum peptide length = 7, matching time  
35 window 0.7 min, alignment time 20 min, with match between runs, along with other  
36 default settings. Data was searched against the Uniprot Swiss-Prot human proteome  
37 (downloaded Sept. 3, 2018). Proteingroups files were exported from Maxquant, filtered  
38 to remove contaminants, and filtered for proteins with at least two unique peptides for  
39 analysis. Data analysis was performed in Perseus (67) and R (69). Identified proteins  
40 were filtered against curated lists of Uniprot-annotated membrane proteins or those  
41 identified in the analysis of Bausch-Fluck *et al.* (10) (Supplementary Table 8).

42 For lenalidomide-resistant cell line analysis using SILAC, peptide search for each  
43 individual dataset was performed using ProteinProspector (v5.13.2) against 20203 human  
44 proteins (Swiss-prot database, obtained March 5, 2015). Enzyme specificity was set to  
45 trypsin with up to two missed cleavage; cysteine carbamidomethyl was set as a fixed  
46 modification; methionine oxidation, lysine and arginine SILAC labels were set as

1 variable modifications; peptide mass tolerance was 6 ppm; fragment ion mass tolerance  
2 was 0.4 Da; peptide identification was filtered by peptide score of 0.0005 in Protein  
3 Prospector, resulting in a false discovery rate (FDR) of <1% calculated by number of  
4 decoy peptides included in the database.

5 Quantitative data analysis was performed using Skyline (68) software with the  
6 MS1 filtering function. Specifically, spectral libraries from forward and reverse SILAC  
7 experiments were analyzed together such that MS1 features without an explicit peptide  
8 ID would be quantified based on aligned peptide retention time. The first four isotopic  
9 peaks of precursor ions were then quantified at 50% FWHM defined by ms1 scanning  
10 resolution of 140,000 (at 200 m/z). The boundary of peptide elution time was determined  
11 by default algorithm and the total peak area was used as the peptide quantification value.  
12 An isotope dot product of at least 0.8 (as calculated by Skyline) was used to filter out low  
13 quality peptide quantification, and a custom report was generated for further processing  
14 and analysis using R. To ensure stringent quantification of the surface proteome, several  
15 filters were applied to eliminate low confidence protein identifications. In the tryptic  
16 fraction, only peptides with five or more well quantified peptides were included. Each  
17 replicate between individual fractions or reverse SILAC labeling agreed with each other,  
18 and forward and reverse SILAC datasets were then combined and reported as median  
19 log<sub>2</sub> enrichment values. All p values reported is Wilcox ranked test for median log<sub>2</sub>  
20 enrichment SILAC ratio. All data analyses were carried out using R.

## 21 22 **Cell Surface Proteomics on Primary Myeloma Cells**

23 CD138<sup>+</sup> myeloma cells were isolated from patient peripheral blood using a magnetic  
24 bead-based approach (EasySep Human CD138 Positive Selection Kit, StemCell  
25 Technologies 17877). The CD138<sup>+</sup> -enriched sample was titrated into 2.5e7, 1e7, 5e6,  
26 1e6, 5e5, 3e5, 1e5 cells for cell-surface labeling and processed to obtain surface peptides  
27 using the micro protocol described above.

## 28 29 **CD53 Immunohistochemistry**

30 Decalcified bone marrow core biopsies were obtained from myeloma patients under a  
31 UCSF Committee on Human Research-approved protocol. The electronic medical record  
32 was evaluated to identify sequential core biopsies performed on the same patient at both  
33 diagnosis and at first relapse. Interpretation was performed by two hematopathologists  
34 (S.P. and E.R.) blinded to patient identification and relapse status. Final H-score was  
35 averaged between pathologists. CD53 staining was assessed on cells with morphology  
36 consistent with plasma cells and CD138<sup>+</sup> staining on adjacent tissue sections.

37 For immunohistochemical staining, tissues were fixed in neutral buffered 10%  
38 formalin for 24 to 48h, dehydrated with graded alcohols and infiltrated with paraffin wax  
39 at 58 degrees in an automated tissue processor. Infiltrated tissue was embedded at 60C to  
40 produce FFPE blocks. FFPE blocks were sectioned at 4 microns. Immunohistochemical  
41 detection on the unstained FFPE tissue sections was performed on Ventana Medical  
42 Systems Discovery Ultra Biomarker Automated Slide Preparation System using alkaline  
43 epitope conditioning (Ventana/Roche CC1) at 97C for 32 minutes. Recombinant rabbit  
44 monoclonal (clone EPR4342(2) directed to CD53 supplied by Abcam (ab134094) used at  
45 1:200 for 32 minutes at 36C. OmniMap anti-Rb HRP (Ventana 760-4311) was used for  
46 chromogenic DAB detection (32 minutes).

1

## 2 **Bioinformatic Analysis of “Locking on” and standalone immunotherapy targets**

3 For “locking on” analysis, LFQ intensity averages, quartiles, and standard  
4 deviation were calculated based on information in Supplementary Dataset 1. The 14  
5 potential locking-on targets were compared to transcript levels in  
6 MMRF\_CoMMpass\_IA16a\_E74GTF\_cufflinks\_Gene\_FPKM data set.

7 For standalone immunotherapy targets, the scoring rubric used is described in  
8 **Supplementary Table 1**. For COMPARTMENTS predictions of subcellular localization,  
9 the data set used was “human\_compartment\_integrated\_full.tsv”, available on  
10 <https://compartments.jensenlab.org/Downloads> and accessed on August 27, 2020. The  
11 CCLE database used for this analysis was:

12 “CCLE\_RNAseq\_rsem\_genes\_tpm\_20180929.txt” and accessed on June 25, 2020.  
13 Available on <https://portals.broadinstitute.org/ccle/data>. For the points assignment, a  
14 TPM average values was taken and a non-heme cancer cell line average was calculated.  
15 Also, the values from each disease were transformed into log<sub>2</sub> values (and the nonheme  
16 averages). The nonheme diseases were: Bile Duct, Breast, Chondrosarcoma Colorectal,  
17 Endometrium, Esophagus, Ewings Sarcoma, Giant cell tumor, Glioma, Kidney, Liver,  
18 Lung NSC, Lung small cell, Medulloblastoma, Melanoma, Mesotelioma, Neuroblastoma,  
19 Osteosarcoma, Other, Ovary, Pancreas, Prostate, Soft Tissue, Stomach, Thyroid, Upper  
20 Aerodigestive, Urinary Tract. The genes where Multiple myeloma were highest  
21 expressed compared to the other diseases were selected and compared to the average  
22 value in non-heme tissues. For Human Blood Atlas analysis, the database used was  
23 “rna\_blood\_cell\_monaco.tsv” available in the Human Protein Atlas portal  
24 <https://www.proteinatlas.org/about/download>. Accessed on August 27, 2020.

25 For GTEx analysis, the dataset used was “GTEx\_Analysis\_2017-06-  
26 05\_v8\_RNASeQCv1.1.9\_gene\_median\_tpm.gct”, accessed on July 16, 2020 and available  
27 on <https://gtexportal.org/home/datasets>. The ESNG gen names were transformed into  
28 HUGO nomenclature using gprofiler2 package in RStudio ([https://CRAN.R-  
29 project.org/package=gprofiler2](https://CRAN.R-project.org/package=gprofiler2)). We calculated a non-heme tissue average and a heme  
30 tissue average. The non-heme tissues were: Adipose Subcutaneous, Adipose Visceral  
31 Omentum, Adrenal Gland, Artery Aorta, Artery Coronary, Artery Tibial, Bladder, Brain  
32 Amygdala, Brain Caudate basal ganglia, Brain Cerebellar Hemisphere, Brain  
33 Cerebellum, Brain Cortex, Brain Frontal Cortex BA9, Brain Hippocampus, Brain  
34 Hypothalamus, Brain Nucleus accumbens basal ganglia, Brain Putamen basal ganglia,  
35 Brain Spinal cord cervical c1, Brain Substantia nigra, Breast Mammary Tissue, Cells  
36 Cultured fibroblasts, Cervix Ectocervix, Cervix Endocervix, Colon Sigmoid, Colon  
37 Transverse, Esophagus Gastroesophageal Junction, Esophagus Mucosa, Esophagus  
38 Muscularis, Fallopian Tube, Heart Atrial Appendage, Heart Left Ventricle, Kidney  
39 Cortex, Kidney Medulla, Liver, Lung, Minor Salivary Gland, Muscle Skeletal, Nerve  
40 Tibial, Ovary, Pancreas, Pituitary, Prostate, Skin Not Sun Exposed Suprapubic, Skin Sun  
41 Exposed Lower leg, Small Intestine Terminal Ileum, Skin Sun Exposed Lower leg, Small  
42 Intestine Terminal Ileum, Stomach, Testis, Thyroid, Uterus, and Vagina. The heme  
43 tissues included were Cells-EBV transformed lymphocytes, Spleen, and Whole Blood.

44 In the end, we merged these 5 data sets, matching by Gene Name, using the  
45 controls mentioned above (used across all the process to verify reliability), for 33654  
46 proteins scored in total. The final data set were created with all the points assigned across

1 all the data set, creating a total score which is the sum of the prior points. Then, the  
2 proteins were ranked by the higher score in a descending manner (see **Supplementary**  
3 **Dataset 2**).

4

#### 5 **Data Availability**

6 Proteomic data generated in this study was deposited to ProteomeXchange via the PRIDE  
7 database (69, 70) (PXD022482, PXD022553). Leukemia proteomic data was downloaded  
8 from PRIDE (PXD016800). RNA sequencing data generated in this study was uploaded  
9 to GEO (GSE160572). Processed leukemia RNA sequencing data was downloaded from  
10 GEO (GSE142447).

11

12

13

14

15

16

17

## 1 FIGURES and FIGURE LEGENDS

### FIGURE 1

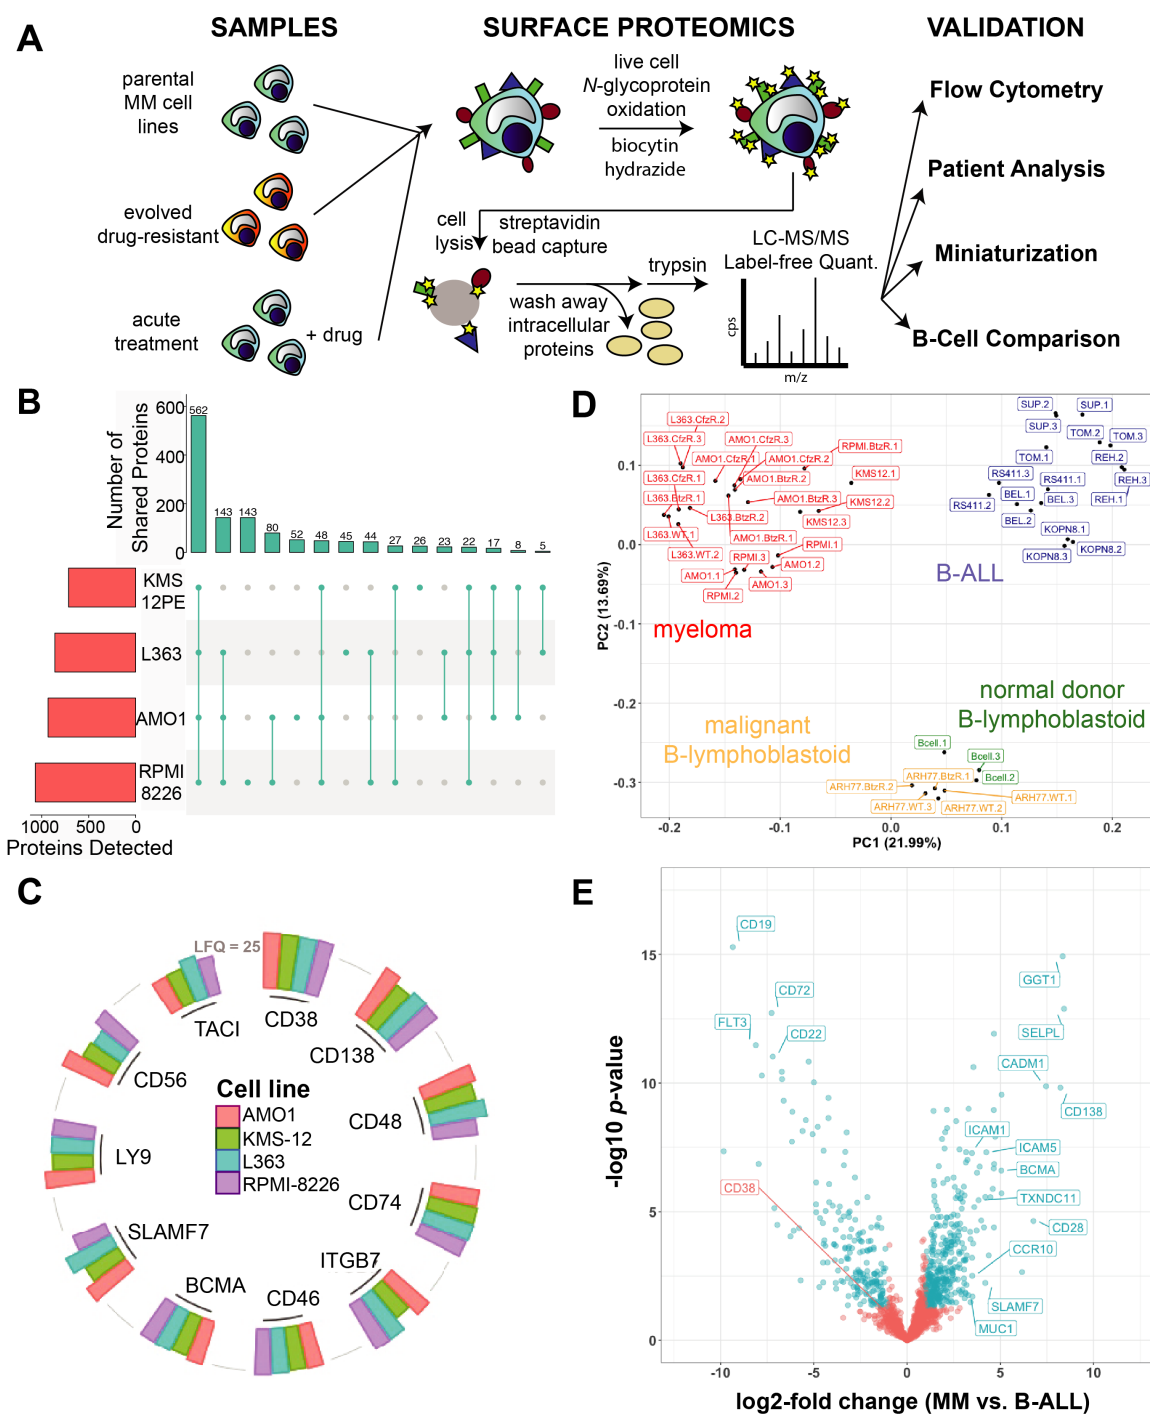

2

3 **Figure 1. Initial elucidation of the myeloma plasma cell “surfaceome”.** A. Overall  
 4 schematic of surface proteomic investigations in this study. This includes a description of  
 5 the modified cell surface capture (CSC) methodology used, with biotinylated proteins  
 6 identified after on-bead trypsinization. B. Upset plot shows high degree of overlap in  
 7 identified glycoproteins across the four evaluated myeloma cell lines. Data included if

1 identified with two peptides in at least one of three biological replicate per cell line. **C.**  
2 Common myeloma diagnostic markers and immunotherapeutic targets were identified by  
3 cell surface proteomics in all four evaluated cell lines. Height of column indicates label-  
4 free quantification (LFQ) intensity from MaxQuant, averaged across replicate samples. A  
5 threshold of LFQ = 25 is indicated by grey line. **D.** Principal Component Analysis (PCA)  
6 illustrates the differential cell surface landscape of myeloma plasma cells versus B-  
7 lymphoblastoid cells and B-cell acute lymphoblastic leukemia cell lines. BtzR and CfzR  
8 are bortezomib and carfilzomib resistant cells ( $n = 2$  or  $3$  biological replicates per cell  
9 line, except for RPMI-BtzR). **E.** Volcano plot comparing glycoprotein LFQ intensity of  
10 four myeloma cell lines to eight B-ALL cell lines. Significantly changed proteins labeled  
11 in blue ( $\log_2$ -fold change  $>|1|$ ;  $p < 0.05$ ).



1

FIGURE 2

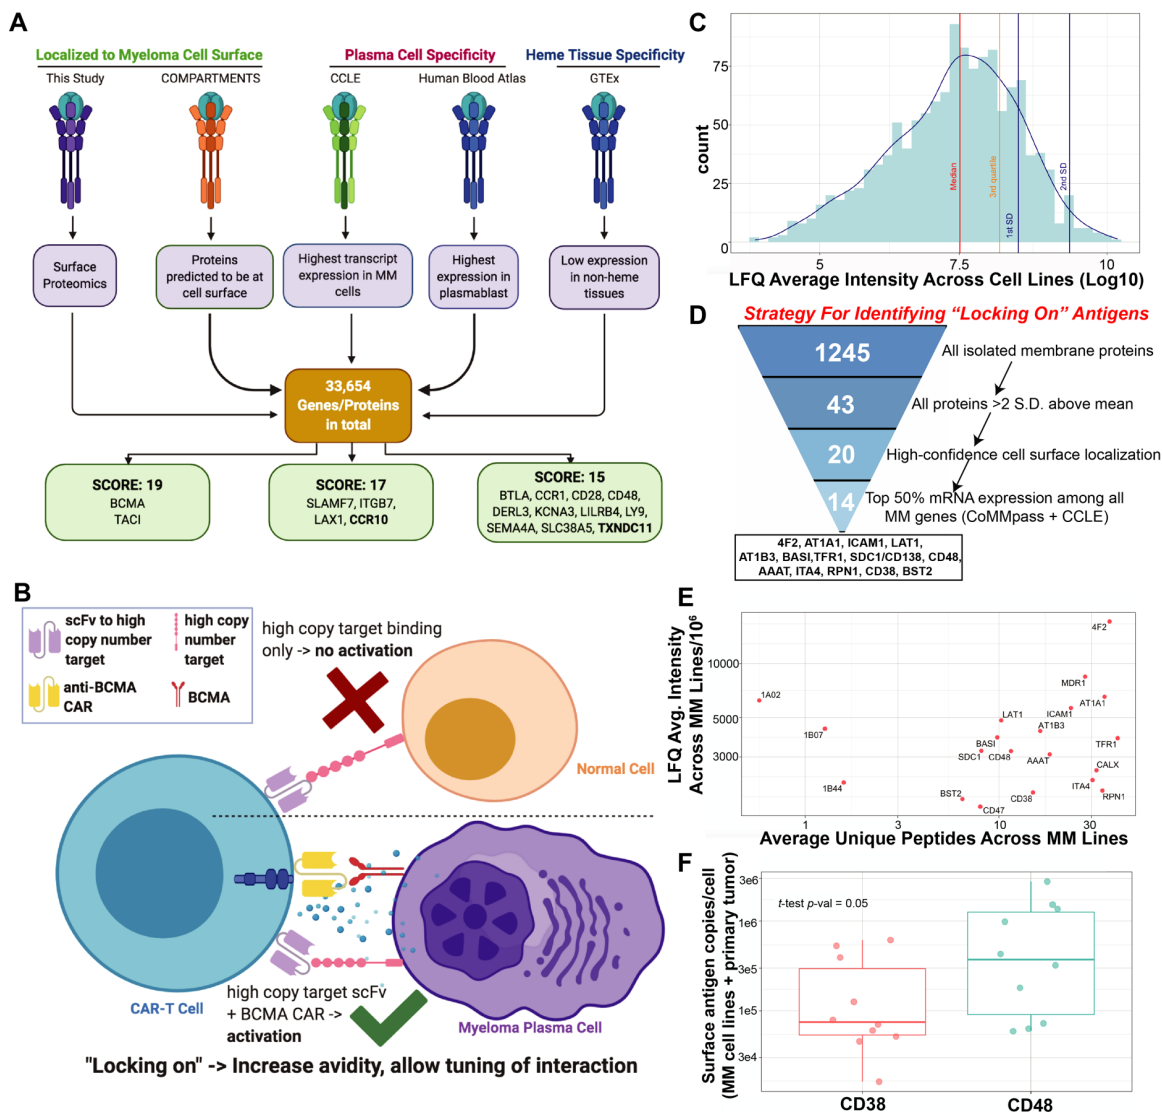

2  
3 **Figure 2. Immunotherapeutically targeting the myeloma cell surfaceome.** **A.** Outline  
4 of a five-criteria scoring strategy, integrating surface proteomics data here with publicly-  
5 available mRNA transcriptome data, to propose new targets for possible antigen-specific  
6 immunotherapies in myeloma (see Methods for details). We specifically point out surface  
7 proteins with the highest scores among the total 33,654 analyzed (see **Supplementary**  
8 **Table 1** for scoring rubric; maximum score = 19). **B.** Schematic illustrating the concept  
9 of using a high-abundance, “locking on” antigen to tune CAR-T activation via increased  
10 avidity. **C.** Distribution of mass spectrometric intensity (label-free quantification (LFQ)  
11 from MaxQuant) of all glycoproteins quantified in our proteomic data; intensity is  
12 averaged across all four analyzed cell lines. **D.** Bioinformatic strategy to nominate  
13 possible high-abundance “locking on” antigens. **E.** Plot displaying the average LFQ  
14 intensity across cell lines of proteins >2 S.D. above the mean (C) versus average unique  
15 peptides identified in each line. **F.** Absolute quantification by flow cytometry for CD38

1 and CD48 antigen density across 3 myeloma cell lines (MM.1S, OPM-2, AMO-1) and  
2 CD138+/CD19- myeloma tumor cells from 5 primary patient bone marrow specimens.  
3 Box plot shows median and interquartile range of surface antigen density. *p*-value by *t*-  
4 test. (A) and (B) created with BioRender.  
5

**FIGURE 3**

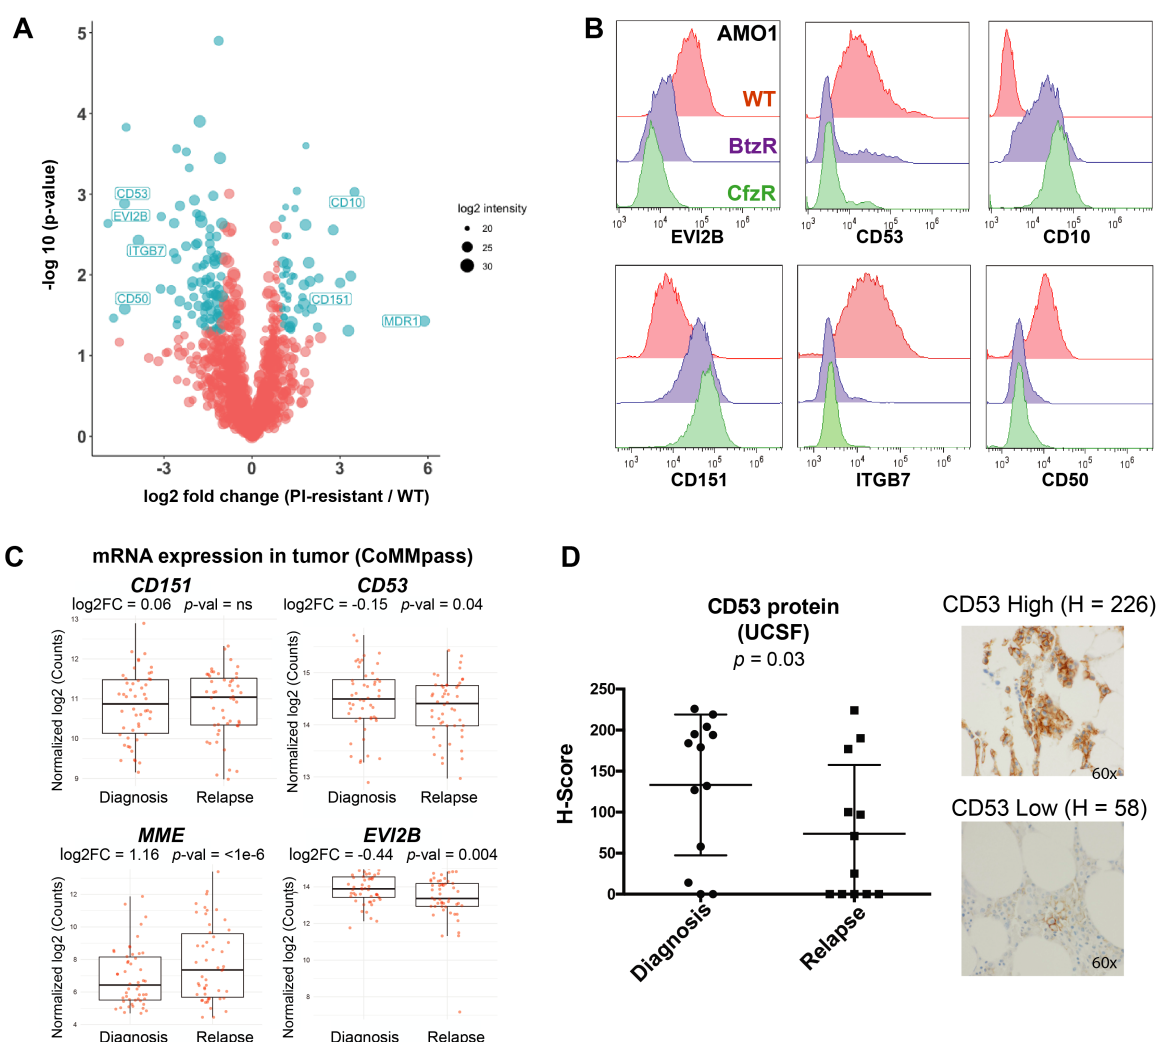

1  
2 **Figure 3. Defining a myeloma surface signature of proteasome inhibitor resistance.**  
3 **A.** Cell surface proteomics was performed on evolved bortezomib-resistant (BtzR) and  
4 carfilzomib resistant (CfzR) myeloma cell lines (AMO-1 BtzR ( $n = 3$ ); AMO1 CfzR ( $n =$   
5 3), L363 BtzR ( $n = 2$ ), L363 CfzR ( $n = 3$ ), RPMI-8226 BtzR ( $n = 1$ )) and aggregated in  
6 comparison to wild-type cell lines (AMO1 ( $n = 3$ ), L363 ( $n = 2$ ), RPMI-8226 ( $n = 1$ )).  
7 Significantly changed proteins in PI-resistant lines shown in blue ( $\log_2$ -fold change  $>|1|$ ;  
8  $p < 0.05$ ). **B.** Validation by flow cytometry of most-changed surface proteins in AMO-1  
9 cells. **C.** mRNA data in the MMRF CoMMpass database (Release IA14) from paired  
10 diagnosis and first-relapse tumor cells ( $n = 50$ ), where all patients had received a PI as  
11 part of their induction regimen. These transcriptome findings in patient samples are  
12 consistent with top hits in our cell line studies, and suggest these transcript changes are  
13 driven by Btz resistance.  $p$ -value by  $t$ -test. **D.** Immunohistochemistry for CD53 on  
14 myeloma plasma cells in bone marrow core biopsies from UCSF patients before and after  
15 Btz treatment ( $n = 13$ ) is also consistent with protein-level decrease. H-scoring (see  
16 Methods) averaged from two independent hematopathologists (E.R. and S.P.).  $p$ -value by  
17  $t$ -test.

1

## FIGURE 4

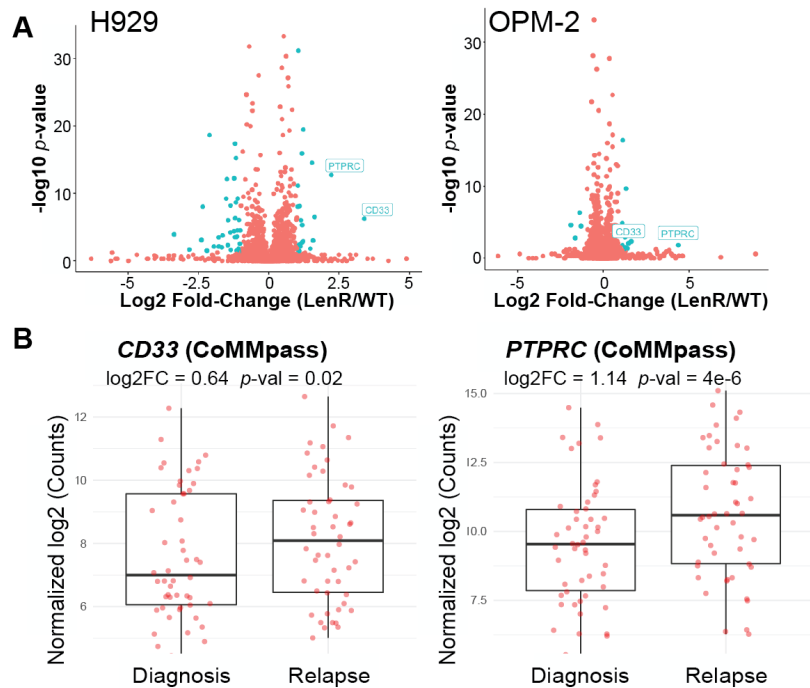

2

3 **Figure 4. Surface proteomic signatures of lenalidomide resistance. A.** *In vitro*-  
4 evolved lenalidomide-resistant H929 and OPM-2 lines were analyzed by cell surface  
5 proteomics with comparison to parental lines by SILAC quantification ( $n = 4$ ; heavy and  
6 light channels swapped for two replicates each). Significantly-changed proteins in blue  
7 ( $\log_2$ -fold change  $> |1|$ ;  $p < 0.05$ ), with only CD33 and PTPRC/CD45 showing common  
8 changes between the two lines **B.** MMRF CoMMpass patient transcript data confirms  
9 significant increase in CD33 and PTPRC at first relapse versus diagnosis, suggesting that  
10 increases in these surface proteins is driven by IMiD resistance.

11

**FIGURE 5**

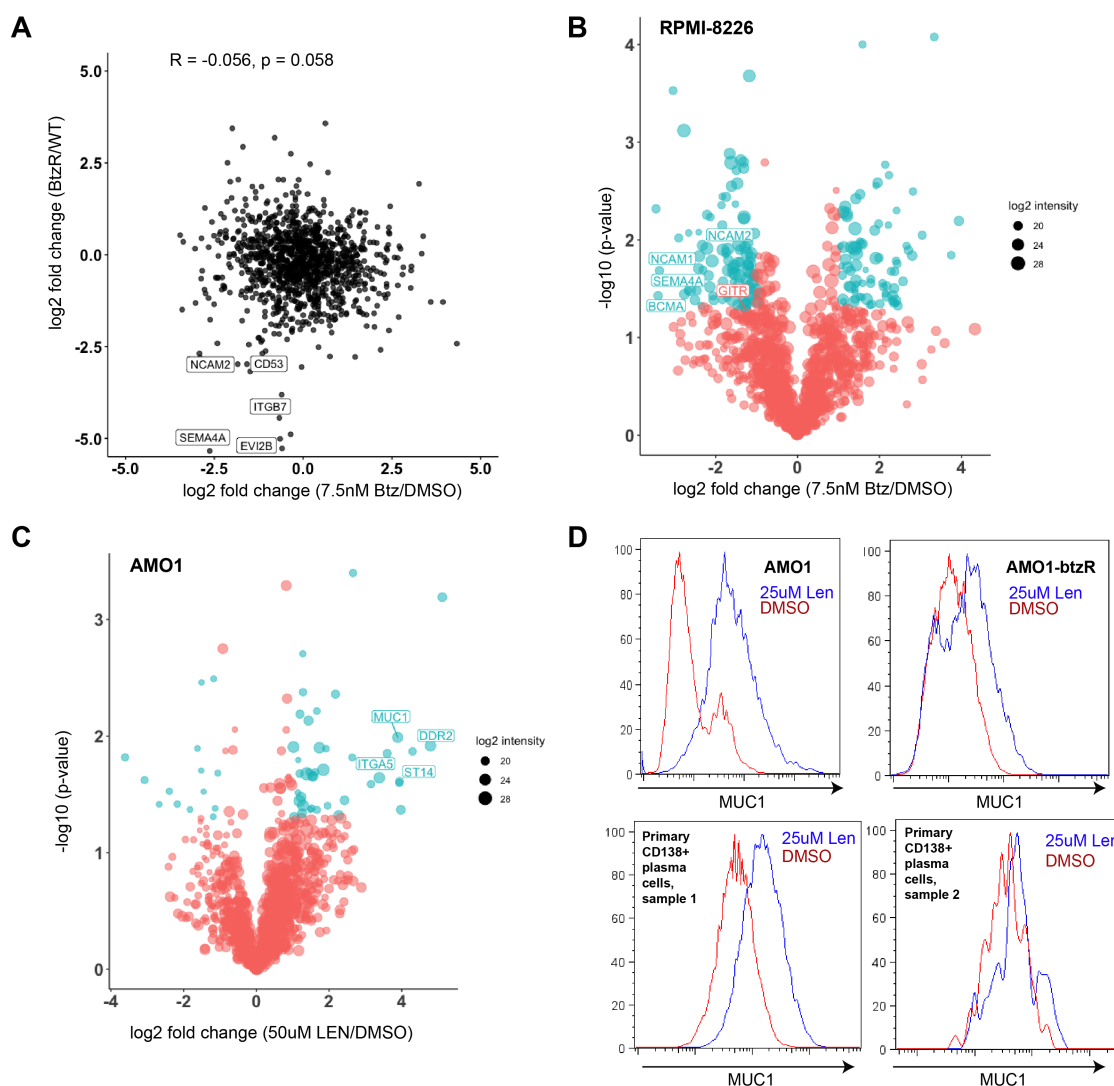

1

2 **Figure 5. Characterizing myeloma surface proteomic changes in response to acute**  
 3 **drug treatment. A.** Correlation in surface proteomic profile between acute Btz treatment  
 4 in RPMI-8226 cells (7.5 nM, 48 hrs,  $n = 3$ ) vs. DMSO ( $n = 4$ ) and aggregate BtzR cell  
 5 line data (as in Fig. 3A) vs. parental. Common changes are observed in some  
 6 downregulated surface proteins but no significant overall correlation is observed. **B.**  
 7 Volcano plot of RPMI-8226 cells treated for 48 hr with 7.5 nM bortezomib, highlighting  
 8 significantly changed proteins ( $\log_2$ -fold change  $>|1|$ ;  $p < 0.05$  in blue). **C.** Similar plot as  
 9 in B., for 48 hour treatment with 50  $\mu$ M Lenalidomide in AMO-1 cells. **D.** Validation of  
 10 increase in surface MUC1 in plasma cells in response to 25  $\mu$ M Lenalidomide treatment,  
 11 in both AMO-1, AMO-1 BtzR, and two primary patient bone marrow aspirates (selected  
 12 on CD138+ plasma cells).

13

1

## FIGURE 6

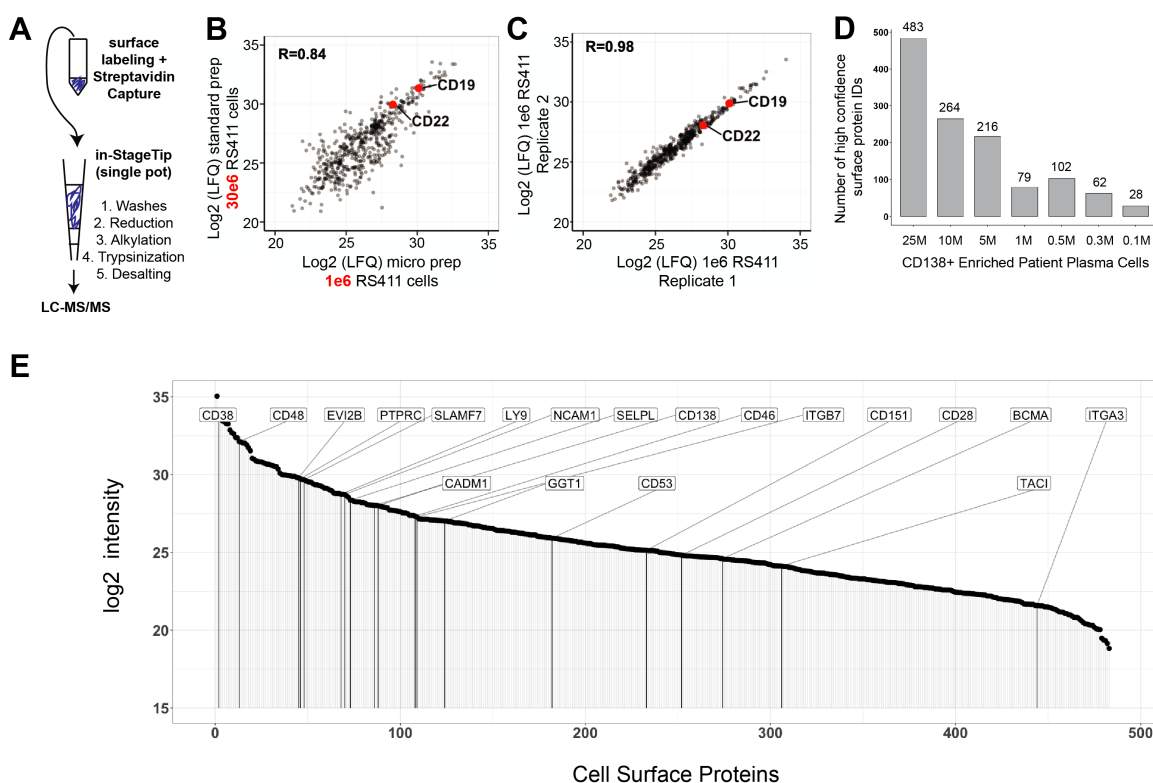

2

3 **Figure 6. "Micro" protocol for cell surface proteomics.** **A.** Schematic of "micro"  
 4 sample preparation method using an In-StageTip approach for all steps after surface  
 5 glycoprotein biotinylation on live cells. **B.** Quantitative comparison of LFQ intensity for  
 6 identified proteins using 30e6 cells in the standard, "macro" protocol, versus 1e6 cells  
 7 using our "micro" protocol. LFQ values averaged from  $n = 2$  biological replicates per  
 8 preparation method; performed with RS4;11 B-ALL cells. **C.** The micro method  
 9 demonstrates excellent reproducibility across both biological replicates at 1e6 cell input.  
 10 **D.** Total number of glycoproteins identified using the "micro" method at various cell  
 11 inputs, on CD138+ tumor cells isolated from a relapsed/refractory myeloma patient with  
 12 a malignant pleural effusion. **E.** Cell surface protein intensities in the 25e6 input  
 13 condition from (D). The large majority of antigens we point out in this work as possibly  
 14 clinically relevant are also detected in the primary patient samples; several exceptions  
 15 include CCR10, which as a GPCR likely is not captured efficiently enough to be found  
 16 by proteomics on this primary sample, CD10, and CD33.

17

1

2 **SUPPLEMENTARY FIGURES and LEGENDS**

**SUPPLEMENTARY FIGURE 1**

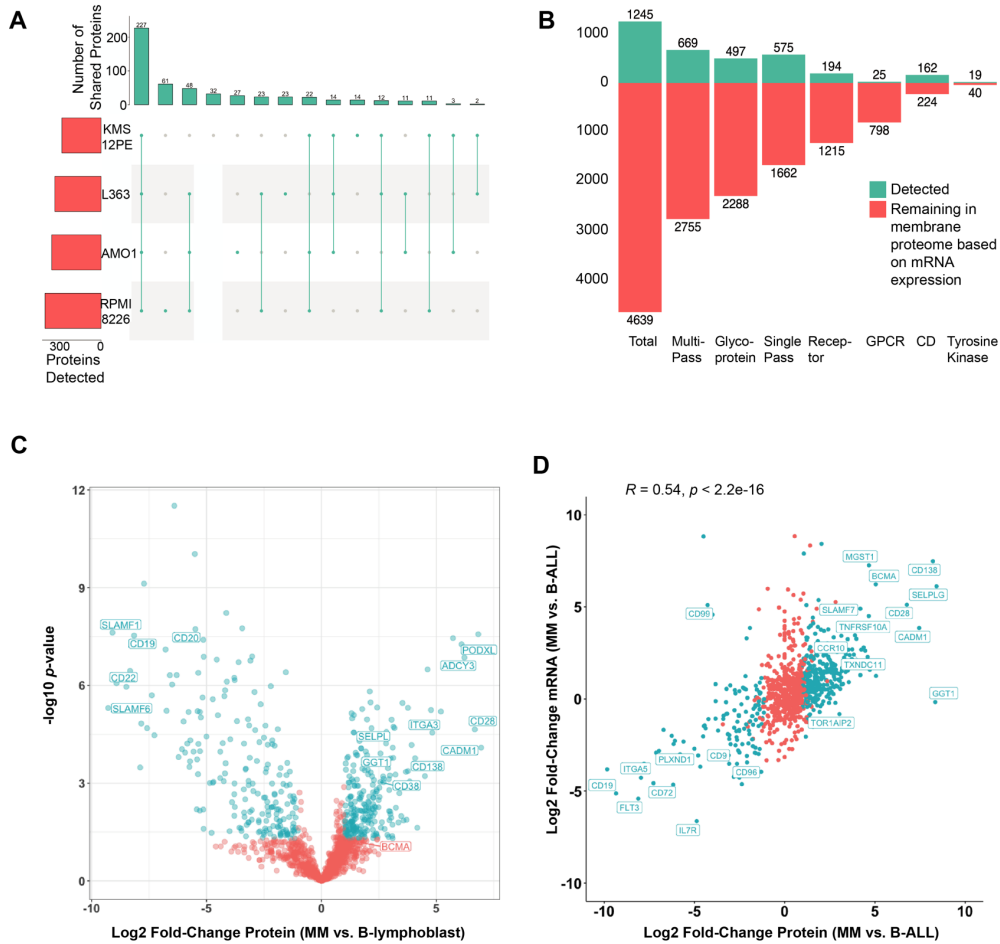

3

4 **Supplementary Figure 1. Additional characterization of the baseline myeloma**  
 5 **surfaceome. A.** Quantified captured proteins (minimum 2 peptides per protein) filtered  
 6 based on highest-confidence plasma membrane localization, from ref. (10). **B.** All genes  
 7 expressed at mRNA level TPM > 1 in the four analyzed cell lines included (per data  
 8 available at keatslab.org) were filtered by Uniprot annotation for different protein classes.  
 9 We then evaluated which fraction were detected by our cell surface capture experiments.  
 10 For example, in this data we identify 45% of Cluster of Differentiation (CD) markers  
 11 predicted to be present on myeloma cells based on mRNA expression, but only 6% of  
 12 GPCRs. **C.** Analogous to Fig. 1E, we compared our myeloma surface profiles across  
 13 myeloma lines (AMO1, L363, RPMI-8226, and KMS12PE) to the two B-lymphoblastoid  
 14 lines examined (ARH-77 and EBV-immortalized normal donor-derived) to identify  
 15 markers that most-distinguish plasma cells. Significantly-changed proteins noted in blue  
 16 ( $\log_2$ -fold change >|1|;  $p < 0.05$ ). **D.** RNA-seq data on B-ALL and myeloma cell lines (as  
 17 in Fig. 1E) was also analyzed for  $\log_2$ -fold changes between cell types and compared to  
 18  $\log_2$ -fold changes from proteomics. This analysis identifies proteins that may be under  
 19 post-transcriptional regulation of surface expression, particularly with significant

1 increases in mRNA but no detected change in captured protein. Proteins labeled in blue  
2 identical to those found to be significant in volcano plot of Fig. 1E. Pearson correlation  
3 and associated *p*-value of significance shown.  
4



## SUPPLEMENTARY FIGURE 2

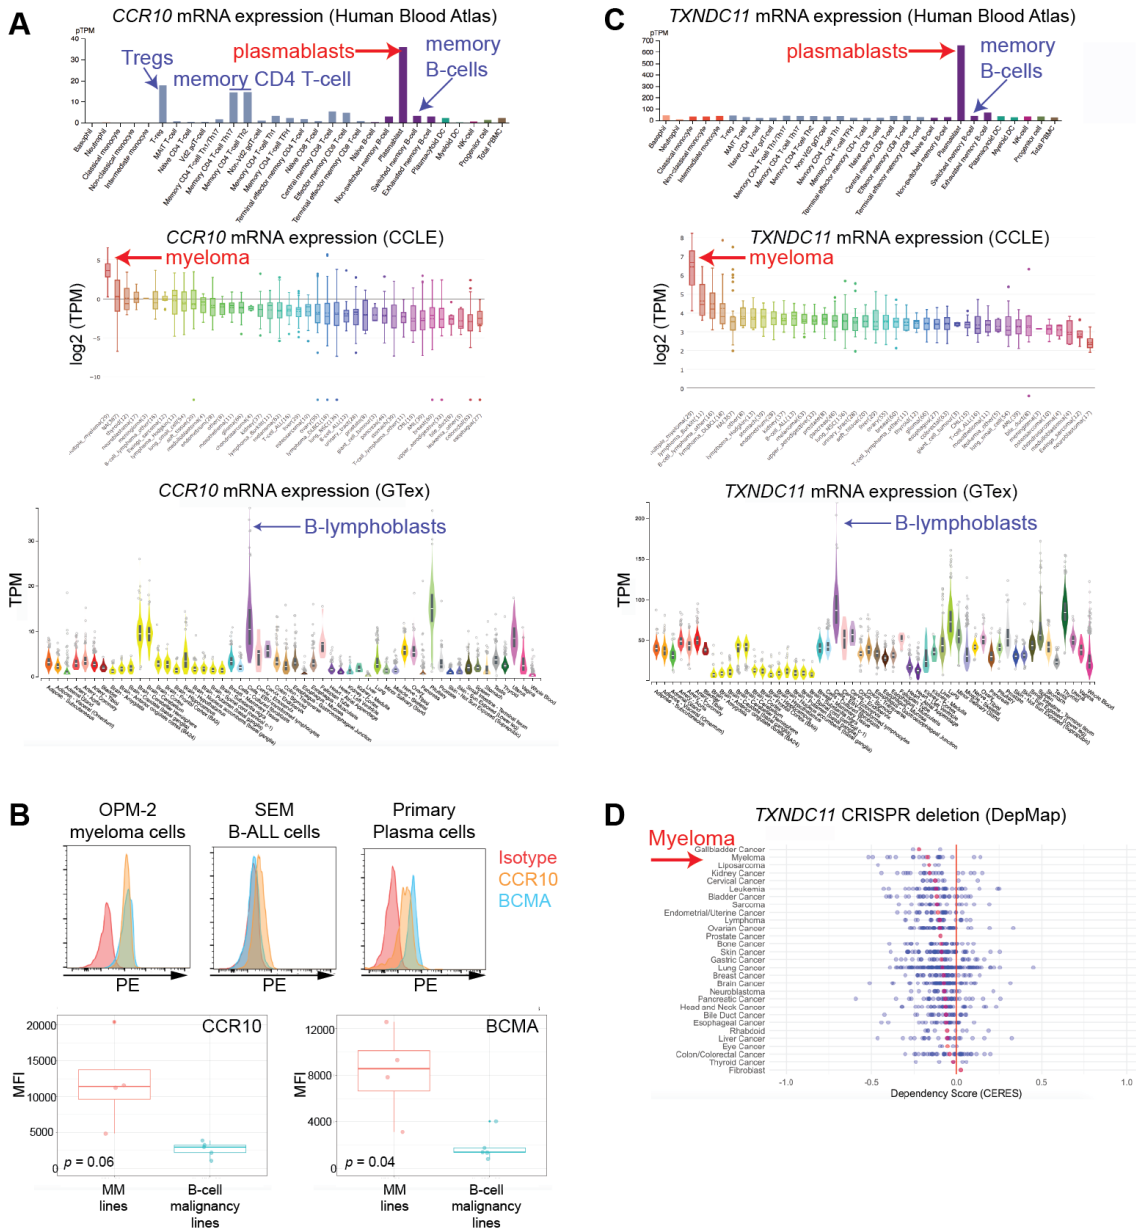

1

2 **Supplementary Figure 2. Additional characterization of *CCR10* and *TXNDC11* as**  
 3 **potential myeloma immunotherapy targets.** **A.** mRNA transcript data from the Human  
 4 Blood Atlas (top) demonstrates that among hematopoietic cells *CCR10* is most highly  
 5 expressed in plasmablasts (we note that long-lived plasma cells are unfortunately not  
 6 included in this dataset; plasmablasts used as closest proxy). Cancer Cell Line  
 7 Encyclopedia (CCLE) (middle) data supports that on average myeloma cell lines express  
 8 >20x more *CCR10* mRNA than any other tumor cell type. GTex (bottom) data does  
 9 suggest some low level *CCR10* expression in non-hematopoietic tissues; B-lymphoblast  
 10 expression can be compared to memory B-cell expression in the Human Blood Atlas.  
 11 Plasmablast expression is therefore expected to be at least 20x higher than other non-  
 12 hematopoietic tissues, supportive of a therapeutic index. **B.** Flow cytometry analysis

1 confirms significantly higher CCR10 expression on myeloma plasma cells (OPM-2,  
2 MM.1S, ANBL-6, AMO-1) than B-cell malignancy cell lines (SEM, RS411 (B-ALL),  
3 HBL-1, OCI-LY10, TOLEDO (B-cell lymphoma)), with similar increase as seen for  
4 BCMA. Analysis of a primary patient plasma cell (CD19-/CD138+/CD38+) specimen  
5 confirms CCR10 expression (*top right*). **C.** Similar analysis as in A., illustrating highly  
6 enriched *TXNDC11* expression on plasmablasts, highly increased expression in myeloma  
7 plasma cells versus any other cancer cell type in the CCLE, and moderate expression in  
8 other non-hematopoietic tissues. **D.** Data from the Cancer Dependency Map  
9 (depmap.org; Avana Public 20Q3) indicate that myeloma cell lines are among the most  
10 genetically dependent on CRISPR deletion of this gene, as noted by lowest CERES score  
11 when averaged across all included tumor cell lines.

### SUPPLEMENTARY FIGURE 3

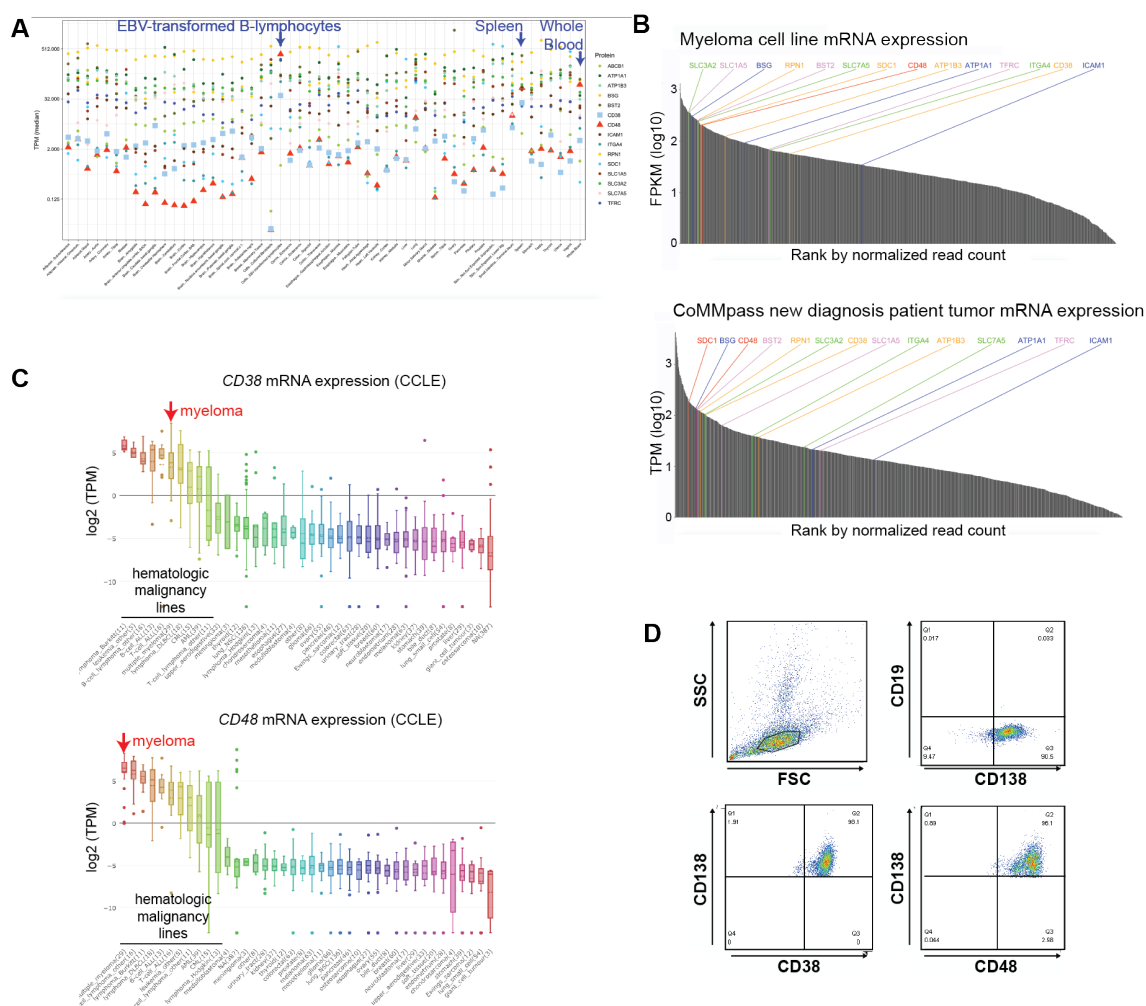

1  
 2 **Supplementary Figure 3. Additional characterization of high abundance surface**  
 3 **antigens for a potential “locking on” strategy.** **A.** Plot of “locking on” candidate (as in  
 4 Fig. 2D) transcript expression in GTex suggests that most genes have significant  
 5 expression in non-hematopoietic tissues, with the exception of CD38 and CD48. **B.**  
 6 mRNA expression of all genes corresponding to proteins identified in our surface  
 7 proteomic datasets were ranked according to average abundance (measured in TPM) in  
 8 both cell lines (keatslab.org dataset) and primary CD138+ tumor cells (MMRF  
 9 CoMMpass release IA15). Potential “locking on” candidates are highlighted. **C.** CCLE  
 10 data highlights that myeloma cell lines express the highest average *CD48* mRNA,  
 11 whereas several other hematopoietic malignancy cell types express greater *CD38* than  
 12 myeloma cells. These data also confirm that non-hematopoietic cells do not appear to  
 13 express these antigens. **D.** Illustration of flow cytometry gating strategy to identify  
 14 primary patient tumor cells for use in absolute quantification of CD38 and CD48.  
 15 Mononuclear cells in patient bone marrow aspirate were gated on singlet, live  
 16 lymphocytes in the SSC/FSC plot and then characterized as CD138+/CD19- plasma cells.  
 17

## SUPPLEMENTARY FIGURE 4

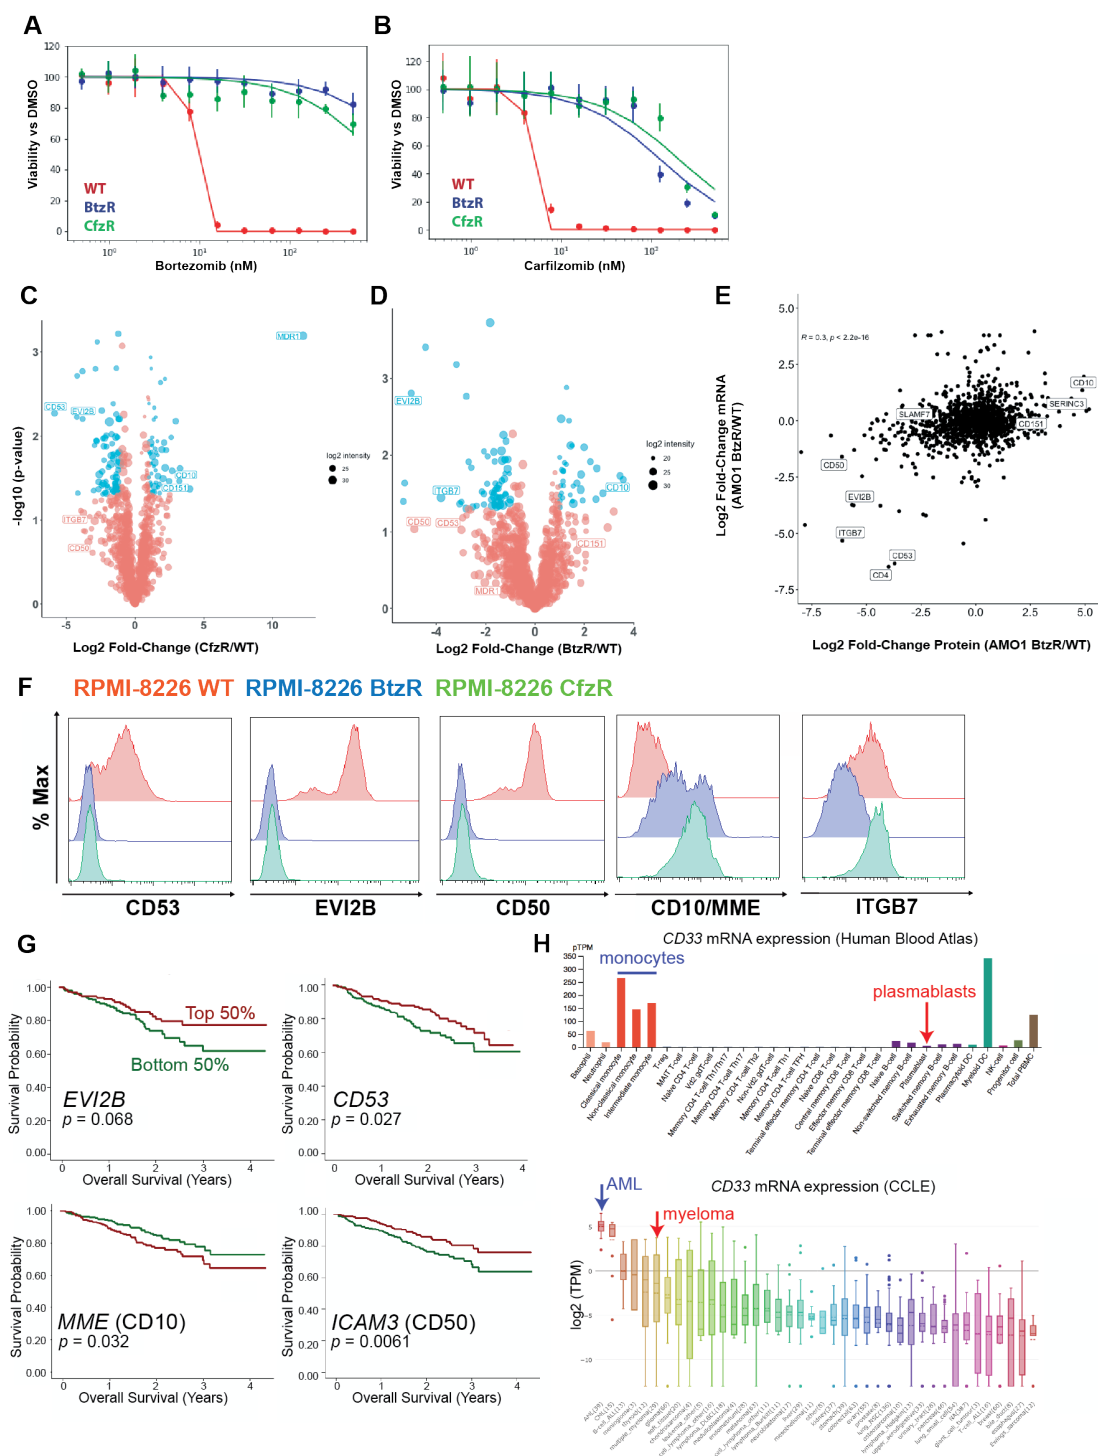

1

2 **Supplementary Figure 4. Additional characterization of surface biomarkers of**  
 3 **myeloma drug resistance. A-B.** Dose response curves for RPMI-8226 WT, BtzR, and  
 4 CfzR evolved resistance lines treated with Btz (A) or Cfz (B) for 48 hours. **C-D.**

5 Analogous to Fig. 3A, we display aggregate data of carfilzomib (C) or bortezomib (D)

1 evolved resistant cell lines (CfzR and BtzR, respectively) versus their parental  
2 counterpart. Consistent with prior findings (35), we note that MDR1 is by far the most  
3 highly-upregulated surface protein in CfzR lines. Significantly-changed proteins noted in  
4 blue ( $\log_2$ -fold change  $>|1|$ ;  $p < 0.05$ ). **E.** Surface proteome-transcriptome comparison of  
5 BtzR AMO-1 vs. parental AMO-1 cells shows positive but relatively weak correlation  
6 (Pearson correlation and associated p-value shown). **F.** Flow cytometry confirms surface  
7 proteomic alterations in PI-resistant RPMI-8226 cells as also seen in AMO-1 cells (Fig.  
8 3B). **G.** MMRF CoMMpass (Release IA10) overall survival data for tumor mRNA  
9 expression of noted putative PI-resistance biomarkers, separated by top (red) and bottom  
10 (green) half of expression.  $p$ -value by log-rank test. **H.** *CD33* is predicted to be expressed  
11 at far lower levels on plasmablasts (used as a proxy for plasma cells) than on normal  
12 myeloid lineage cells per data in the Human Blood Atlas (top), and myeloma cell lines  
13 express far less CD33 than AML cell lines in the CCLE (bottom).  
14

## SUPPLEMENTARY FIGURE 5

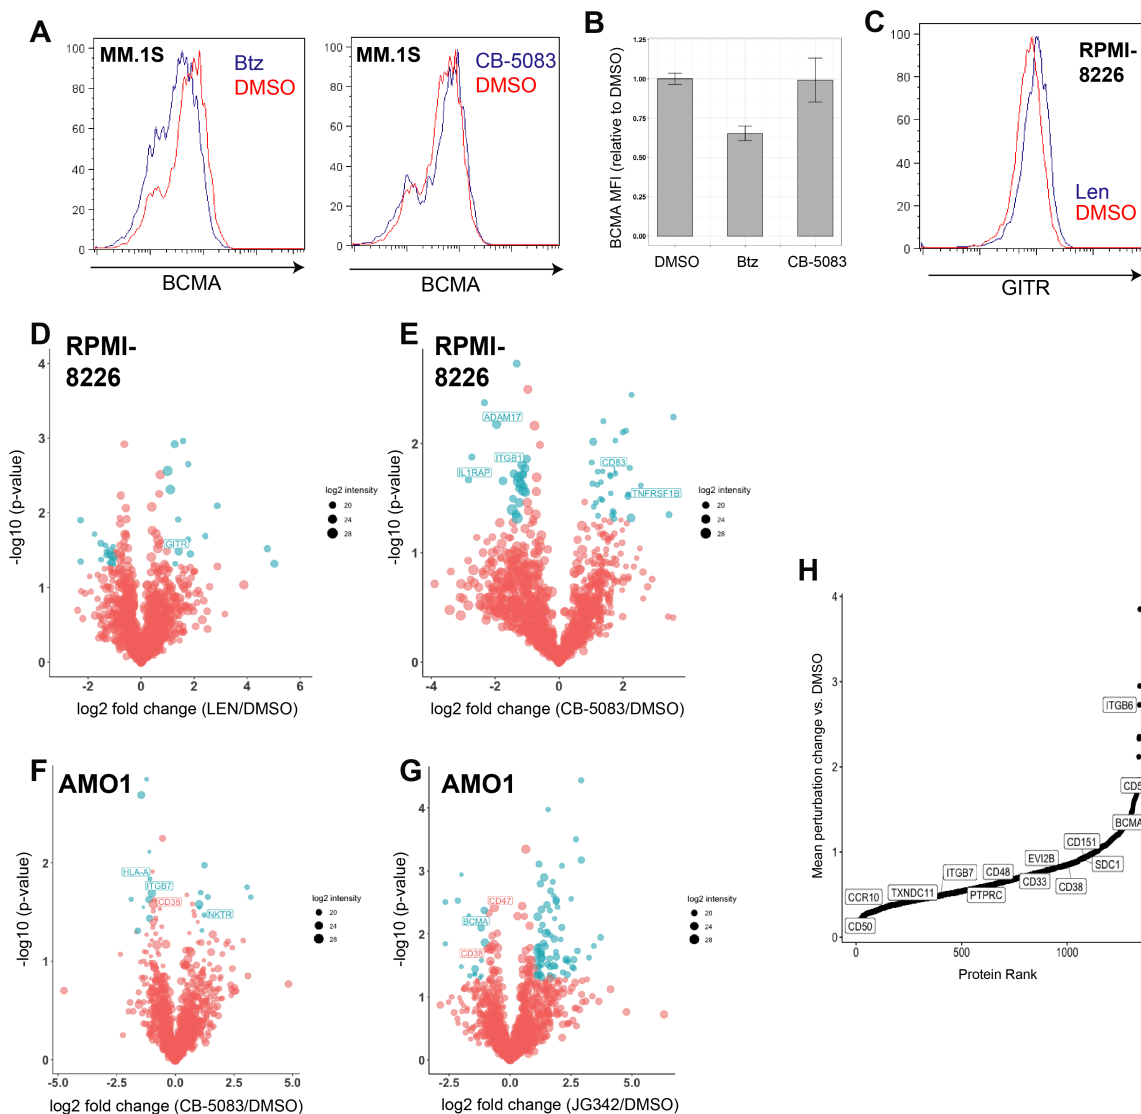

1  
2  
3  
4  
5  
6  
7  
8  
9  
10  
11  
12  
13  
14  
15

**Supplementary Figure 5. Probing myeloma surfaceome effects of acute drug treatment.** **A.** MM.1S cells treated with 2.5 nM Btz for 48 hours show a decrease in surface BCMA as measured by flow cytometry, while treatment with 250nM CB-5083 for 48 hours shows no change. **B.** Quantification of results in (A) using median fluorescence intensity ( $n=2$ ). **C.** RPMI-8226 cells treated with 25  $\mu$ M Len show increase in GITR ( $n = 2$ ). **D-G.** Profiling of RPMI-8226 cells treated with 50  $\mu$ M Len for 48 hours (D), or 300 nM CB-5083 for 48 hours (E), and AMO1 cells treated with 250 nM CB-5083 for 48 hours (F), or 750 nM JG-342 for 48 hours (G) shows remodeling of the surface proteome ( $n = 3$ ). **H.** Mean of protein absolute value change for 48 hour perturbations vs. DMSO for RPMI (Lenalidomide, Bortezomib, CB-5083) and AMO1 (Lenalidomide, CB-5083, JG342). Proteins on the right side of the distribution show the greatest variability across drug treatments while those on the left side show the least variability.

## SUPPLEMENTARY FIGURE 6

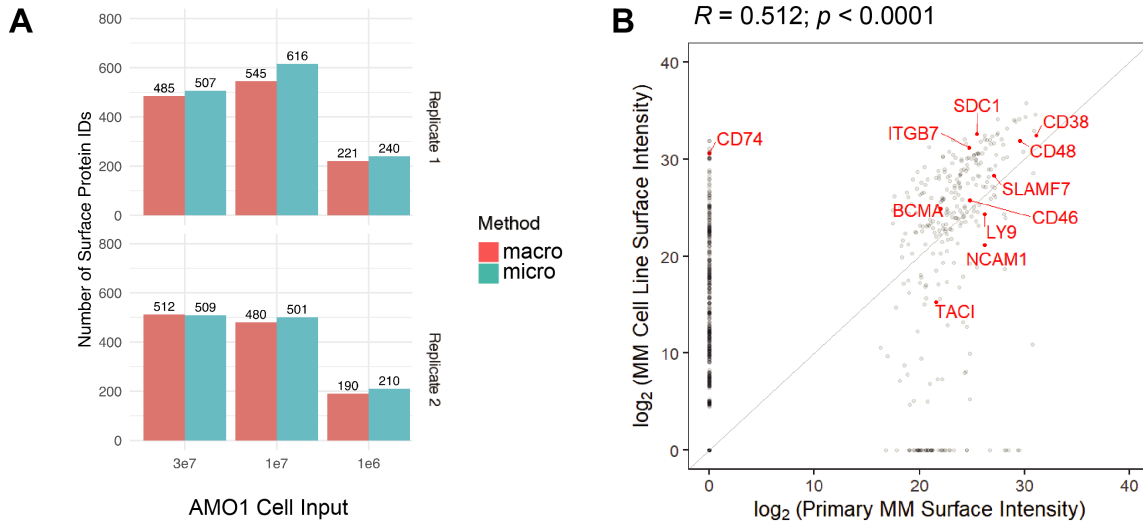

1

2 **Supplementary Figure 6. “Micro” method application to myeloma cell lines and**  
3 **primary sample. A.** Surface protein identifications of the “micro” method applied to  
4 AMO1 myeloma cells, across a range of cell inputs, show less advantage over the  
5 standard “macro” method than initially found on RS4;11 B-ALL cells (Fig. 6B). **B.**

6 Quantitative comparison of identified surface proteins (by LFQ intensity) in the assessed  
7 primary sample ( $x$ -axis) versus averaged over the four profiled myeloma cell lines ( $y$ -  
8 axis). We note very few proteins identified in the primary sample were not found in the  
9 assessed cell lines (i.e. few points with quantified LFQ intensity in the primary sample  
10 but 0 in cell lines). Many more proteins were identified in cell lines but not in the primary  
11 sample; however, this finding cannot determine whether these proteins are not truly  
12 expressed in the primary sample at all or were just unquantified due to lower overall  
13 proteomic coverage. Pearson correlation  $R$  value reported.

14

15

1 **SUPPLEMENTARY TABLE 1**

2

| Dataset                                                   | 5 points                                                                                                                                             | 4 points                                                                                              | 3 points                                                                | 2 points                                                                | 1 point                                                                 | 0 points                                                                  |
|-----------------------------------------------------------|------------------------------------------------------------------------------------------------------------------------------------------------------|-------------------------------------------------------------------------------------------------------|-------------------------------------------------------------------------|-------------------------------------------------------------------------|-------------------------------------------------------------------------|---------------------------------------------------------------------------|
| <b>Myeloma surface proteomics (this study)</b>            |                                                                                                                                                      |                                                                                                       | Identified in aggregate proteomic dataset*                              |                                                                         |                                                                         | Not identified in aggregate proteomic dataset                             |
| <b>COMPARTMENTS (subcellular localization prediction)</b> |                                                                                                                                                      |                                                                                                       | Highest-confidence prediction at plasma membrane                        |                                                                         | Low-confidence prediction of plasma membrane localization               | No predicted localization to plasma membrane                              |
| <b>Cancer Cell Line Encyclopedia</b>                      | Highest expression in myeloma cells, with >16-fold (4-fold on log2 scale) greater average expression than average in non-hematopoietic tumor types** |                                                                                                       | Highest expression in myeloma cells, but not meeting >16-fold threshold | Myeloma cell lines within top 5 most highly-expressing tumor cell types | Expressed in myeloma cells but not highly compared to other tumor types | Not expressed in myeloma cells                                            |
| <b>Human Blood Atlas (Monaco et al. dataset)</b>          |                                                                                                                                                      | At least 10-fold higher expression in plasmablasts*** than any NK cells, T-cell, or myeloid cell type |                                                                         | Highest expression in plasmablasts but not meeting >10-fold criteria    |                                                                         | Expressed but no enrichment in plasmablasts vs. other hematopoietic cells |
| <b>Genotype Tissue Expression (GTEx) project</b>          |                                                                                                                                                      | Average TPM in non-hematopoietic tissues**** <5                                                       |                                                                         | Average TPM in non-hematopoietic tissues <50                            |                                                                         | Average TPM in non-hematopoietic tissues >50                              |

3

4 **Supplementary Table 1. Scoring rubric to determine potential myeloma surface**  
 5 **antigens for immunotherapeutic targeting.** Assigned points based on perceived  
 6 subjective importance to success of an immunotherapeutic strategy versus a specific  
 7 antigen. Maximum possible score = 19.

8

\*Aggregate dataset includes cell surface capture proteomics on wild-type (RPMI-8226, AMO-1, L363, and KMS12-PE cells.

9

\*\*Non-hematopoietic cell types include all except “multiple\_myeloma”, “B-cell\_lymphoma\_other”, “lymphoma\_Burkitt”, “lymphoma\_DLBCL”, “B-cell\_ALL”, “T-cell\_ALL”, “leukemia\_other”, “T-cell\_lymphoma\_other”, “AML”, “CML”, “lymphoma\_Hodgkin”.

10

\*\*\*plasmablasts are used as a proxy for plasma cells as long-lived plasma cells are not analyzed as part of this dataset

11

\*\*\*\*non-hematopoietic tissues include all except “Cells – EBV-transformed lymphocytes”, “spleen”, and “whole blood”.

12

13

14

15

16

17

18

19



1 **SUPPLEMENTARY DATASET LEGENDS**

2

3 **Supplementary Dataset 1. Mass spectrometry on Myeloma, B-lymphoblast, and**  
4 **Leukemia cell lines.**

5

6 **Supplementary Dataset 2. Output of ranking metrics for myeloma immunotherapy**  
7 **targets**

8

9 **Supplementary Dataset 3. Mass spectrometry on Proteasome-inhibitor resistant and**  
10 **WT Myeloma cell lines.**

11

12 **Supplementary Dataset 4. RNA sequencing on Proteasome-inhibitor resistant and**  
13 **WT Myeloma cell lines.**

14

15 **Supplementary Dataset 5. Mass spectrometry on Myeloma cell lines treated with**  
16 **small molecule inhibitors.**

17

18 **Supplementary Dataset 6. Mass spectrometry on primary patient sample using**  
19 **“micro” method.**

20

21 **Supplementary Dataset 7. Mass Spectrometry on Lenalidomide resistant and WT**  
22 **MM cell lines.**

23

24 **Supplementary Dataset 8. Membrane Protein lists use for filtering and data**  
25 **analysis.**

26

27
